1 Cardiac hemodynamics and ventricular stiffness of sea-run cherry salmon  
2 (*Oncorhynchus masou masou*) differ critically from those of landlocked masu  
3 salmon

4  
5 Yuu Usui<sup>1, \*</sup>, Misaki Kimoto<sup>1</sup>, Akira Hanashima<sup>1</sup>, Ken Hashimoto<sup>1</sup>, Satoshi Mohri<sup>1</sup>

6  
7  
8  
9 <sup>1</sup> First Department of Physiology, Kawasaki Medical School, Kurashiki, Japan

10

11

12 \* Corresponding author

13 E-mail: [usuiyuu08@med.kawasaki-m.ac.jp](mailto:usuiyuu08@med.kawasaki-m.ac.jp) (YU)

14

15 Short title: Ventricular diastolic properties of *O. masou*

16

## 17 **Abstract**

18 Ventricular diastolic mechanical properties are important determinants of cardiac function and  
19 are optimized by changes in cardiac structure and physical properties. *Oncorhynchus masou*  
20 *masou* is an anadromous migratory fish of the Salmonidae family, and several ecological  
21 studies on it have been conducted; however, the cardiac functions of the fish are not well  
22 known. Therefore, we investigated ventricular diastolic function in landlocked (masu salmon)  
23 and sea-run (cherry salmon) types at 29–30 months post fertilization. Pulsed-wave Doppler  
24 echocardiography showed that the atrioventricular inflow waveforms of cherry salmon were  
25 biphasic with early diastolic filling and atrial contraction, whereas those of masu salmon were  
26 monophasic with atrial contraction. In addition, end-diastolic pressure–volume relationship  
27 analysis revealed that the dilatibility per unit myocardial mass of the ventricle in cherry salmon  
28 was significantly suppressed compared to that in masu salmon, suggesting that the ventricle of  
29 the cherry salmon was relatively stiffer (relative ventricular stiffness index;  $p = 0.0263$ ).  
30 Contrastingly, the extensibility of cardiomyocytes, characterized by the expression pattern of  
31 Connectin isoforms in their ventricles, was similar in both types. Histological analysis showed  
32 that the percentage of the collagen accumulation area in the compact layer of cherry salmon  
33 increased compared with that of the masu salmon, which may contribute to ventricle stiffness.  
34 Although the heart mass of cherry salmon was about 11-fold greater than that of masu salmon,  
35 there was no difference in the morphology of the isolated cardiomyocytes, suggesting that the  
36 heart of the cherry salmon grows by cell division of cardiomyocytes, but not cell hypertrophy.  
37 The cardiac physiological function of the fish varies with differences in their developmental  
38 processes and life history. Our multidimensional analysis of the *O. maosu* heart may provide a  
39 clue to the process by which the heart acquires a biphasic blood-filling pattern, i.e., a ventricular  
40 diastolic suction.

## 41 **Introduction**

42 Ventricular stiffness, myocardial relaxation, and atrial pump functions are important for  
43 diastolic ventricular filling, a major determinant of cardiac output [1]. Ventricular stiffness is  
44 adjusted to suit the lifestyle of an individual and increases with age and growth [2, 3] by varying  
45 muscle mass, architecture, and geometry of the chambers [4]. Therefore, investigations and  
46 comparisons of the ventricular diastolic properties of individuals within a species at different  
47 developmental stages and body weights are crucial to advance the understanding of the  
48 physiological adaptations of the heart.

49 Ventricular diastolic functions at the organ and tissue level are evaluated by  
50 echocardiography and ventricular pressure–volume relationship analysis. For example,  
51 Doppler echocardiography shows blood inflow waveforms that determine the speed and  
52 direction of blood transfer from the atria to the ventricle using the pressure gradient between  
53 them [5]. Another is the assessment of mechanical properties for investigating the ventricular  
54 diastolic pressure–volume relationship, which has been used since early studies of cardiac  
55 mechanics [6-8]. End-diastolic pressure–volume relationship (EDPVR) analysis has been  
56 developed as one of the important concepts for interpreting cardiac mechanics and is  
57 established as a valid evaluation method for ventricular stiffness for both *in vivo* and *ex vivo*  
58 studies [4, 9-12]. EDPVRs on the graph are shown as a nonlinear curve, and the steeper the  
59 slope of this curve ( $dV/dP$ ), the stiffer the ventricle. Clinical studies using EDPVR analytics  
60 have reported diastolic dysfunction with increasing ventricular stiffness by hypertension and  
61 aortic stenosis [13, 14]. When assessing the stiffness of ventricles of different sizes, their  
62 relative ventricular stiffness was also evaluated by normalization [15, 16]. Collagen  
63 accumulation, changes in collagen types, and inflammation were the distinguishing factors of  
64 stiffer ventricles [17-20].

65           Cardiomyocytes are heart-specific muscle cells and are responsible for generating  
66   diastolic and contractile force of the heart. The passive tension of cardiomyocytes is one of the  
67   determinants of ventricular filling dynamics as it provides resistance to expand the lumen of  
68   the ventricle. Connectin, encoded by *ttn*, is a protein comprising sarcomeres, and functions to  
69   generate tension forces in accordance with sarcomere lengths as biological springs [21-24].  
70   The elastic potential of Connectin depends on the splicing of N2A and/or N2B spring segments,  
71   number of PEVK spring segment repeats, and phosphorylation levels of the protein [24-30].  
72   Mammalian cardiomyocytes co-express the Connectin isoforms N2BA (3,700 kDa and  
73   compliant) and N2B (3,000 kDa and stiff) [31-34]. The expandability of cells changes  
74   according to the ratio of these isoforms [30, 35-37].

75           Teleosts possess a heart with four compartments: a sinus venosus, atrium, ventricle,  
76   and bulbus arteriosus (S1A and S1B Fig) [38-40]. Venous blood enters the sinus venosus from  
77   the liver and is pumped into the atrium and then the ventricle and is ejected to the ventral aorta  
78   through the bulbus arteriosus. Each compartment is separated by a valve. Most teleost  
79   ventricles are composed of two histologically distinct myocardial layers: a compact layer and  
80   a spongy layer [41-44]. The former is circumferentially arranged from dense cardiomyocytes  
81   as the ventricular wall under the epicardium, while the latter has cardiomyocytes arranged in a  
82   network, and is found in the luminal region of the ventricles. Venous blood from the atrium  
83   flows into the intertrabecular space. Based on the histological findings for compact layer  
84   thickness and the distribution patterns of the coronary vessels, fish ventricles are classified into  
85   four types (types I–IV) [44-46].

86           The Salmonidae family is extremely varied and includes 11 genera and at least 70  
87   species that are believed to be extant [47]. Most species in this family change their habitats  
88   with migratory behaviors and have adapted to both freshwater and seawater environments.  
89   Owing to these ecological characteristics, their cardiovascular systems have been investigated

90 as useful models for physiology [41, 48-52]. A triangular pyramidal ventricle is commonly  
91 found in the hearts of Salmonidae fish (Atlantic salmon [*Salmo salar*], sockeye salmon  
92 [*Oncorhynchus nerka*], and rainbow trout [*Oncorhynchus mykiss*]) [42, 53]. As the nutrient  
93 vessels at the ventricle are confined to the compact layer, these salmon ventricles were  
94 classified as type II. In addition, this ventricle type is believed to be an effective pump as it can  
95 transfer blood at higher heart rates than saccular and tubular ventricles [54, 55]. The salmonid  
96 compact layer thickens as it grows [56, 57]. Exercise, mechanical stress, and hormones also  
97 remodel the salmonid heart [58-64], and thermal changes induce collagen accumulation and  
98 increase heart stiffness [65, 66].

99 *Oncorhynchus masou masou* is an anadromous migratory fish belonging to the  
100 salmonid family and has two predominant life history types: landlocked (masu salmon) and  
101 sea-run (cherry salmon) (S1C Fig) [67, 68]. These fish have remarkably different skin patterns  
102 and body sizes. Transient increases in the secretion of hormones such as the thyroid hormone,  
103 growth hormone, cortisol, adrenocortical hormones, and sex hormones in the blood are  
104 involved in the smolt and anadromous processes [67-72]. While there have been many studies  
105 on the ecology of *O. masou*, to the best of our knowledge, there have been no studies to date  
106 on its cardiac functions.

107 In this study, we aimed to investigate the possible differences in the ventricular diastolic  
108 functions of masu salmon and cherry salmon. To compare the diastolic function of their hearts,  
109 we observed their atrioventricular inflows using pulsed-wave Doppler echocardiography and  
110 evaluated their passive ventricular mechanical properties by pressure–volume analysis *in vivo*  
111 and *ex vivo*; moreover, we compared their ventricular stiffness, heart histology, cardiomyocyte  
112 morphology, and the expression patterns of Connectin isoforms.

113

## 114 **Materials and methods**

### 115 **Experimental approval**

116 All experiments in this study were performed following the guidelines and approved protocols  
117 for animal care and use (approval number for animal use: 20-147) of the animal experiment  
118 committee at Kawasaki Medical School.

119

### 120 **Masu and cherry salmon**

121 Twenty-one juvenile fish, six months post fertilization (mpf), were purchased online from  
122 Azuma Yougyojou Y.K. (Gunma, Japan). They were maintained for one week in 8-L  
123 freshwater tanks, with 10 fish per tank, because one juvenile died the day after transport. A  
124 total of 30 masu salmon (*O. masou* landlocked type) 29–30 mpf (25 fish) and 34 mpf (5 fish)  
125 were purchased online from Utanogawa Yamame Yougyojou (Yamaguchi, Japan). After  
126 arrival, they were maintained in 70-L freshwater tanks, with 5 or 10 fish per tank. They were  
127 used in the experiment within one week of their arrival. Eleven cherry salmon (*O. masou* sea-  
128 run type) at 29–30 mpf were purchased from Wakao-Suisan Co., Ltd. (Hyogo, Japan). After  
129 transport, they were maintained in 200-L seawater tanks with a salinity of 35 g/L (1.023  
130 specific gravity) [73], and two or three fish per tank. For the cherry salmon, *in vivo* experiments  
131 were performed within two days of their transport. All fish tanks were maintained at 10°C with  
132 a 14-/10-h light/dark cycle. The salmon were fed a commercial diet (Remix, Meito Suien Co.,  
133 Ltd., Aichi, Japan, Cat# M-450) and promptly euthanized after data collection. Fish were  
134 randomly selected for this study as sex could not be specified at the time of purchase.

135

## 136 **Echocardiography and electrocardiography**

137 Echocardiography in pulsed-wave Doppler mode and electrocardiography were recorded using  
138 an Aplio 300 system (Toshiba Medical System Corp., Tochigi Japan) with a 14-MHz  
139 transducer and three electrodes. Mild anesthetic induction by MS-222 (50 mg/L, Sigma-  
140 Aldrich, Merck KGaA, Darmstadt, Germany) [74] was used to treat five masu salmon and two  
141 cherry salmon until there was minimal gill movement. The anesthetized fish were placed upside  
142 down in the tank. The ultrasound transducer probe was placed on their heart positions, and the  
143 detection depth and brightness were adjusted for each fish (S2A Fig). The waveforms of  
144 atrioventricular inflows were observed immediately after ventricular outflow recordings  
145 because it is impossible to measure these flows simultaneously with a single probe. From the  
146 pulse-wave Doppler images, ventricular outflow times and velocities were calculated using Fiji  
147 software version 2.3.0 [75]. Each interval between the end of the ventricular outflow and the  
148 onset of the first atrioventricular inflow was calculated by subtracting the average time of  
149 ventricular outflow from each time from the peak of the R wave to the onset of atrioventricular  
150 inflow. The changes in the potential across the *O. masou* body surface by electrical excitation  
151 of the heart were measured by clipping electrodes to their pectoral and pelvic fins (S2A Fig).  
152 Aeration was performed during the measurements. After recording, all fish were euthanized  
153 using MS-222 (250 mg/L) for organ sampling.

154

## 155 ***In vivo* atrial and ventricular pressure measurements**

156 Five anesthetized masu salmon 34 mpf were placed upside down in the tank. A Single  
157 Transducer Set, DTX Plus DT-4812 (Argon Medical Devices, Inc., Plano, TX, USA), with  
158 needles was used to measure the pressure. Using an echocardiographic live image, a 25-G  
159 needle was inserted from the ventral side into the ventricle and a 27-G needle was inserted  
160 under the operculum into the atrium. The ventricular pressure tracing data were used to mediate

161 the pressure recording interface (Power Lab 8/30, ADInstruments Pty Ltd., Dunedin, New  
162 Zealand) and were digitized at 200 Hz using LabChart 7 software (ADInstruments) and  
163 recorded. After recording, all fish were euthanized using MS-222 (250 mg/L).

164

### 165 ***Ex vivo* ventricular pressure–volume analysis**

166 Four masu salmon and three cherry salmon were euthanized, after which their hearts were  
167 removed. A catheter was inserted into the ventricles through the atrioventricular valve and  
168 fixed by ligation. Fluids in the ventricular lumen were washed using 10 U/mL heparin  
169 FUJIFILM Wako Pure Chemical Corp., Osaka, Japan) and 10 mM 2,3-butanedione monoxime  
170 (BDM; FUJIFILM Wako Pure Chemical Corp.) in Ca<sup>2+</sup>- and Mg<sup>2+</sup>-free phosphate-buffered  
171 saline (PBS; Takara Bio Inc., Kusatsu, Japan). The aortic valve was then ligated. To measure  
172 the pressure–volume relationship of the ventricles, saline solution was injected into the  
173 ventricles using an infusion pump (Terumo Corp., Tokyo, Japan). The ventricular pressure data  
174 were recorded at 400 Hz with a multielectrode conductance catheter using LabChart 7 software  
175 The data for each EDPVR were described as an exponential fit based on the following equation:

$$176 \quad P_{\text{ressure}} = A + Be^{C V}, \quad (1)$$

177 where A, B, and C were constants that describe the ventricular exponential pressure-normalized  
178 volume property; constant A indicated the intercept on the pressure axis (A = -B), and C  
179 indicated the index of the ventricular stiffness. V was the ventricular volume [4]. When  
180 comparing the ventricular stiffness in hearts of different sizes, V was normalized by the  
181 ventricular mass to calculate the stiffness per unit of ventricular mass and described by the  
182 following equation:

$$183 \quad V = v_t m^{-1}, \quad (2)$$

184 where  $v_t$  was the total volume of saline infused into the ventricle at time  $t$ ,  $v_0 = 0$ , and  $m$  was  
185 the ventricular mass [15].



186

## 187 **Tissue staining**

188 Masu and cherry salmon hearts were fixed in 4% paraformaldehyde (PFA; Sigma-Aldrich,  
189 Merck) at 4°C for 48 h and embedded in paraffin blocks. The mounted glass slides with 5- $\mu$ m-  
190 thick heart sections were immersed in Clear Plus (FALMA Corp., Tokyo, Japan) followed by  
191 100%, 95%, and 70% ethanol solutions for deparaffinization, and finally rinsed with water.  
192 The methods for Elastica van Gieson and hematoxylin and eosin staining are described in the  
193 sub-sections. After staining, the tissue sections were dehydrated in 70%, 95%, and 100%  
194 ethanol solutions and ethanol/xylene mixed solution, immersed in xylene four times, and sealed  
195 using a mounting medium (Muto Pure Chemicals Co., Ltd., Tokyo, Japan). The sections were  
196 observed under a bright-field microscope IX53, (Olympus, Tokyo, Japan) using the cellSens  
197 software version 1.18 (Olympus) and BZ-X700 microscope (Keyence, Osaka, Japan). The  
198 collagen fiber content in the compact layer and cardiomyocyte density were measured using  
199 Fiji software version 2.3.0 [75].

## 200 **Elastica van Gieson staining**

201 The heart sections were immersed in Maeda's resorcinol fuchsin stain solution (Muto Pure  
202 Chemicals Co., Ltd.) for 1 h and washed with 100% ethanol. The sections were then immersed  
203 in Weigert's iron hematoxylin solution and washed with Milli-Q water. The specimens were  
204 then immersed in Picro-Sirius Red solution (ScyTek Laboratories, Inc., West Logan, UT,  
205 USA) for 15 min, air-dried, and rinsed with xylene.

## 206 **Hematoxylin and eosin staining**

207 The heart sections were immersed in Hansen's hematoxylin solution (Sigma-Aldrich, Merck)  
208 for 5 min, followed by washing with water. To define the nuclei, sections were immersed in

209 0.2% hydrochloric acid–70% ethanol solution for 1 min, and then immersed in eosin Y solution  
210 (Millipore, Merck) for 30 s.

211

## 212 **Cardiomyocyte isolation and primary cultures**

213 For the isolation and primary cultures of the cardiomyocytes from the masu and cherry salmon,  
214 we used a previously described zebrafish protocol [76]. We euthanized two masu salmon 29–  
215 30 mpf and two cherry salmon 29–30 mpf, collected their ventricles, and washed their lumens  
216 by injecting heparin buffer (10 U/mL heparin in PBS). The ventricles were dissected into 3–  
217 mm<sup>2</sup> columns and shaken at 800 rpm for 90–120 min at 30°C with 750  $\mu$ L digestion buffer  
218 (12.5  $\mu$ M CaCl<sub>2</sub>, 5 mg/mL collagenase type II [Thermo Fisher Scientific Inc., Waltham, MA,  
219 USA], 5 mg/mL collagenase type IV [Thermo Fisher Scientific Inc.], 10 mM HEPES, 30 mM  
220 taurine, 5.5 mM glucose, and 10 mM BDM). Next, the cell suspension was filtered through a  
221 100- $\mu$ m nylon cell strainer, and 1 mL CaCl<sub>2</sub> buffer (12.5  $\mu$ M CaCl<sub>2</sub>, 10% fetal bovine serum  
222 [FBS; HyClone, Cytiva, Marlborough, MA, USA, Lot#15N353], 10 mM HEPES, 30 mM  
223 taurine, 5.5 mM glucose, and 10 mM BDM) was added and centrifuged at 200  $\times$  g for 5 min at  
224 4°C. After discarding the supernatant, 1 mL of CaCl<sub>2</sub> buffer was added and the mixture was  
225 centrifuged at 200  $\times$  g for 5 min at 4°C. After being centrifuged, the isolated cells were  
226 resuspended using the culture media (Eagle’s minimum essential medium with 4.5 g/L glucose,  
227 2 mM L-glutamine, 1 mM sodium pyruvate, and phenol red [FUJIFILM Wako Pure Chemical  
228 Corp.], 5 mM BDM, 5% FBS, and 100 U/mL penicillin-streptomycin [Thermo Fisher  
229 Scientific Inc.]) and seeded on a glass-bottom dish (Iwaki Co. Ltd., Tokyo, Japan) with 0.01%  
230 poly-L-lysine (Millipore, Merck) coating. Primary cells were cultured at 25°C under 5% CO<sub>2</sub>.  
231 Twenty-four hours after incubation, the primary cells were observed using a BZ-X700  
232 fluorescence microscope (Keyence). The longitudinal length and area of the cardiomyocytes  
233 were measured using Fiji software version 2.3.0 [75].

234

## 235 **Immunostaining**

236 Primary cardiomyocytes were fixed in 4% PFA at 4°C for 15 min. They were then  
237 permeabilized with 0.02% Triton X-100 in PBS for 15 min and blocked with 5% bovine serum  
238 albumin (Sigma-Aldrich, Merck) in PBS for 3 h. These cells were incubated with primary  
239 antibody, monoclonal anti- $\alpha$ -actinin (Sarcomeric) antibody produced in mouse (1:1000,  
240 Sigma-Aldrich, Merck, clone EA-53, Cat# A7811), at 4°C overnight, and subsequently stained  
241 with a secondary antibody, polyclonal goat anti-mouse IgG (H+L) cross-adsorbed secondary  
242 antibody, Alexa Fluor 488 (1:1000, Thermo Fisher Scientific Inc., Cat# A-11001), and  
243 Hoechst33342 (Tokyo Chemical Industry Co., Ltd., Tokyo, Japan, Cat# H342) for 1 h at 25°C.  
244 Using an FV1000 confocal laser scanning microscope system mounted IX81 (Olympus), the  
245 sarcomeric structures and the number of nuclei in the cardiomyocytes were then examined.

246

## 247 **Sodium dodecyl sulfate-agarose gel electrophoresis and western** 248 **blotting**

249 The atria, ventricles, and bulbus arteriosus were separated from the hearts of the masu and  
250 cherry salmon 29–30 mpf. Each sample was homogenized using Polytron (Kinematica AG,  
251 Malters, Switzerland) in a sample buffer (8 M urea, 2 M thiourea, 3% sodium dodecyl sulfate  
252 [SDS], 75 mM dithiothreitol, 0.03% bromophenol blue, 0.05 M Tris-HCl [pH 6.8], and  
253 protease inhibitor cocktail [Thermo Fisher Scientific Inc.]), heated at 65°C for 10 min,  
254 centrifuged at  $16,000 \times g$  for 5 min at 4°C and then the supernatant was collected. Cleared  
255 lysates were loaded into wells of the SDS-agarose gels (1% SeaKem Gold Agarose [Lonza,  
256 Basel, Switzerland], 30% glycerol, and  $1 \times$  Tris/glycine/SDS [TG-SDS] buffer [Takara Bio  
257 Inc.]) and then electrophoresed in a running buffer ( $1 \times$  TG-SDS buffer and 10 mM 2-

258 mercaptoethanol) at 0.01 A for 90 min [77]. To avoid the gel sliding from the gel plate during  
259 manipulation, the SDS-agarose gel was stacked and fixed on a 1-cm-high acrylamide plug gel  
260 (12% acrylamide, 10% glycerol, 0.5 M Tris-HCl [pH 9.0], 0.0015% N,N,N',N'-  
261 tetramethylethylenediamine, and 0.056% ammonium persulfate). The patterns of the band  
262 peaks on the Coomassie Brilliant Blue (CBB)-stained gels were scanned using the Gel  
263 Analyzer plugin of Fiji software version 2.3.0.

264 For western blotting, the electrophoresed proteins were transferred from SDS-agarose  
265 gel to a nitrocellulose membrane (Bio-Rad Laboratories, Inc., Hercules, CA, USA) with a semi-  
266 dry western blot system (Pierce Power Blotter, Thermo Fisher Scientific) at 25 V for 10 min.  
267 After blocking the membrane with Tris buffer saline containing 0.05% Tween 20 and 5% skim  
268 milk, the Connectin proteins in the heart tissue were identified using a polyclonal primary  
269 antibody, the C-terminus of chicken Connectin (1:1000, Pc72C) [78], and polyclonal goat anti-  
270 rabbit immunoglobulin/HRP (1:1000, DAKO Agilent Technologies, Inc., Palo Alto, CA, USA,  
271 Cat# P044801-2) as a secondary antibody. Connectin blots were detected using the  
272 chemiluminescence reagent Western Lightning ECL Pro (PerkinElmer Co., Ltd., Waltham,  
273 MA, USA) and acquired using ImageQuant LAS 4000 (GE Healthcare, Chicago, IL, USA).

274

## 275 **Transmission electron microscopy**

276 To observe the sarcomere structures in the cardiomyocytes using a transmission electron  
277 microscope (TEM), the fish hearts at 29–30 mpf were washed with 10 U/mL heparin and 10  
278 mM BDM in PBS and fixed with 4% PFA and 2.5% glutaraldehyde in PBS for 1 h at 25°C.  
279 The fixatives were thoroughly washed with PBS. The samples were then post-fixed in 1%  
280 osmium tetroxide in PBS and immersed in 50%, 60%, 70%, 80%, 90%, 95%, 99%, and 100%  
281 ethanol consecutively for dehydration. Next, the samples were passed through propylene oxide,  
282 embedded in epoxy resin, and polymerized in an incubator for 72 h at 60°C. Sections that were

283 500 nm thick were produced from the resin block using an ultramicrotome and collected on  
284 glass slides. After reaching the desired section, 70-nm ultrathin sections were cut and placed  
285 on a single-hole grid coated with Formvar film. The grids were air-dried and stained with  
286 uranyl acetate and lead citrate. Electron micrographs were recorded using TEM JEM-1400  
287 (JEOL Ltd., Tokyo, Japan), operated at 80 kV.

288

## 289 **Statistical analysis**

290 The experimental results are presented as the mean  $\pm$  standard deviation (SD); the number of  
291 samples used in each analysis is indicated in each figure legend. *P*-values were calculated using  
292 Student's *t*-test or one-way analysis of variance (ANOVA) with Tukey's multiple comparisons  
293 test and are indicated on graphs and text. The threshold for significant difference was set at a  
294 *p*-value of  $\leq 0.05$ . GraphPad Prism8 software version 8.4.3 (GraphPad Software, San Diego,  
295 CA, USA) was used to conduct all statistical analyses.

296

## 297 **Results**

### 298 **Evaluation of the ventricular hemodynamics in masu and cherry** 299 **salmon with pulsed-wave Doppler echocardiography**

300 At 29–30 mpf, the cherry salmon were found to be approximately 2.4 times bigger and 17 times  
301 heavier than the masu salmon (Fig 1A and 1B; Table 1). We also investigated their  
302 hemodynamics at this developmental stage. Pulsed-wave Doppler echocardiography and  
303 electrocardiography were simultaneously performed to observe their atrioventricular inflow in  
304 sinus rhythms. To set the pulsed-wave Doppler gate window downstream of the  
305 atrioventricular valve, a sagittal long-axis view including the atrium, ventricle, and bulbus  
306 arteriosus was acquired (S2B and S2C Fig; S1 and S2 Movies). Electrocardiography revealed  
307 regular P waves, QRS complexes, and T waves (S2D Fig).

308

### 309 **Fig 1. Recordings of the waveforms of the atrioventricular inflows in masu and cherry** 310 **salmon using pulsed-wave echocardiography**

311 (A, B) Representative *Oncorhynchus masou masou* pictures: (A) masu salmon at 29 months  
312 post fertilization, (B) cherry salmon reared in seawater for five months after being reared in  
313 freshwater for 24 months. Scale bars = 10 cm. (C, D, E) Representative velocity waveforms of  
314 atrioventricular inflows in the masu (C) and cherry salmon of monophasic (D) and biphasic  
315 patterns (E). Blood passing the atrioventricular valve was observed using pulsed-wave Doppler  
316 echocardiography simultaneously with electrocardiography. Green arrowheads indicate P  
317 waves. Black left–right double arrows indicate R-R intervals. a: atrial systolic velocity, e/a:  
318 fusion velocity of atrial systolic and early diastolic inflows, e: early diastolic velocity. (F) Peak  
319 wave velocity. ○: masu salmon atrial systolic velocity ( $31.34 \pm 6.43$  cm/s, N = 37 peaks from  
320 five fish), ▲: cherry salmon early diastolic waves and atrial systolic waves (e/a) fusion velocity

321 (36.69 ± 3.57 cm/s, N = 12 peaks from two fish), ■: cherry salmon early diastolic velocity  
 322 (16.47 ± 2.56 cm/s, N = 15 peaks from two fish), ●: cherry salmon atrial systolic velocity  
 323 (34.70 ± 4.22 cm/s, N = 15 peaks from two fish). Lines and error bars indicate the mean ±  
 324 standard deviation.

325

326 **Table 1. Body size and heart mass measurements (means ± standard deviation) for**

327 *Oncorhynchus masou masou*

| N                | Age<br>(months) | Standard<br>length (cm) | Full length<br>(cm) | Body                   |                     |                                  |
|------------------|-----------------|-------------------------|---------------------|------------------------|---------------------|----------------------------------|
|                  |                 |                         |                     | maximum<br>height (cm) | Body weight<br>(g)  | Heart mass<br>(mg)               |
| Juvenile 19      | 6               | 5.65 ± 0.40             | 6.65 ± 0.39         | 0.92 ± 0.10            | 1.49 ± 0.22<br>(g)  | 2.73 ± 0.27<br>(mg)              |
| Masu<br>salmon   | 20 29–30        | 18.90 ± 0.52            | 21.28 ± 0.62        | 4.16 ± 0.66            | 0.08 ± 0.25<br>(kg) | 0.15 ± 0.02<br>(g) <sup>†</sup>  |
| Cherry<br>salmon | 11 29–30        | 45.46 ± 3.30            | 47.38 ± 3.60        | 11.20 ± 1.14           | 1.36 ± 0.37<br>(kg) | 1.69 ± 0.19<br>(g) <sup>††</sup> |

328 <sup>†</sup> N = 13. <sup>††</sup> N = 7.

329

330 Pulsed-wave Doppler echocardiography revealed that the atrioventricular inflow  
 331 patterns in the masu salmon showed sequential single forward flow waveforms that were  
 332 synchronized with the P waves, indicating atrial contraction (Fig 1C). The heart rate of masu  
 333 salmon as recorded with echocardiography was 109 ± 12.0 beats/min (bpm, N = 5 fish) (S1  
 334 Table). In masu salmon #5, the time from the R wave to the end of ventricular outflow was  
 335 326.75 ± 1.04 ms (N = 4 beats) (S3A Fig). When the interval times for the onset of ventricular  
 336 systole (R-R interval times) took 624 ms (short) and 958 ms (long), the time between the end

337 of ventricular outflow and the appearance of atrioventricular inflow waveforms was estimated  
338 to be 160 ms and 396 ms, respectively (S3 Fig). Regardless of the duration of the R-R interval,  
339 the atrioventricular inflow waveforms showed a monophasic pattern; furthermore, the atrial  
340 pressure in the ventricular diastole of the masu salmon was the same as the ventricular pressure  
341 for a while after isovolumic relaxation and became higher than the ventricular pressure in the  
342 atrial systole (S4 Fig). Hence, the monophasic inflow waveforms in masu salmon were  
343 presumed to indicate atrial systolic velocity.

344         Interestingly, the forward flow waveforms began to appear in the atrioventricular  
345 inflow patterns of the cherry salmon, even before the P waves were recorded (Fig 1D). When  
346 the R-R interval took  $> 0.77$  s, echography recorded clear biphasic waveforms (Fig 1E, S3 Fig).  
347 The low forward waveforms appeared before the P wave, and the high forward waveforms  
348 appeared after the P wave. Therefore, the former and the latter were presumed to be comparable  
349 to the early ventricular diastolic and atrial systolic velocities, respectively. In addition, the  
350 sequential monophasic waves in cherry salmon were likely to be the fusion of these two  
351 velocities (early ventricular diastolic and atrial systolic [e/a] fusion velocity). The mean  $\pm$  SD  
352 of the early diastolic velocity peak in the cherry salmon was  $16.47 \pm 2.56$  cm/s, which was  
353 lower than the atrial systolic velocity ( $p < 0.0001$ , Fig 1F). The ratio of the early diastolic  
354 velocity/atrial systolic velocity (E/A ratio) was  $0.48 \pm 0.06$  in the cherry salmon. In cherry  
355 salmon #1, the interval time from the R wave to the end of ventricular outflow was  $351.75 \pm$   
356  $1.09$  ms ( $N = 4$  beats). Whether the R-R interval times were 720 ms (short), 772 ms  
357 (intermediate), or 908 ms (long), the times from the end of ventricular outflow until the  
358 appearance of atrioventricular inflow waveforms remained almost the same, at 92–96 ms (S3  
359 Fig). Under MS-222 anesthesia, the heart rates of cherry salmon were  $72 \pm 5.3$  bpm ( $N = 2$   
360 fish) and lower than that of masu salmon ( $p = 0.0164$ , S1 Table).

361



## 362 **Analysis of ventricular stiffness in masu and cherry salmon**

363 To investigate ventricular stiffness, we performed the EDPVR analysis *ex vivo*. The  
364 interventricular pressure of masu salmon reached 20 mmHg in response to injection with 0.27–  
365 0.31 mL saline (S4A Fig), while that of cherry salmon reached ~20 mmHg in response to  
366 injection with 1.13–1.91 mL saline, and the smaller ventricles tended to show steeper EDPVR  
367 curves (S4 Fig). However, the normalized EDPVR curves of the cherry salmon shifted to the  
368 left were steeper compared to those of the masu salmon (Fig 2A). The indices of ventricular  
369 stiffness were  $1.042 \pm 0.187$  in masu salmon and  $2.205 \pm 0.736$  in cherry salmon, and the  
370 ventricles of cherry salmon were significantly stiffer than those of masu salmon based on the  
371 measurement of ventricular stiffness per unit myocardial mass ( $p = 0.0263$ , Fig 2B).

372

### 373 **Fig 2. Relative ventricular stiffness of masu and cherry salmon**

374 (A) The normalized end-diastolic pressure–volume relationship (EDPVR) at 30 months post  
375 fertilization for masu and cherry salmon. The horizontal axis shows the ventricular volume  
376 normalized by the mass of the masu ( $N = 4$ ) and cherry salmon ventricles ( $N = 3$ ). The vertical  
377 axis shows the ventricular pressure. Ventricular mass is shown in S5B Fig. (B) Scores for  
378 ventricular stiffness in the masu and cherry salmon. The results of the EDPVR (A) were  
379 appended in Equation (1) to obtain the exponential  $C$ , and the means  $\pm$  standard deviations  
380 were calculated; masu salmon ( $C = 1.042 \pm 0.187$ ), cherry salmon ( $C = 2.205 \pm 0.736$ ). Black  
381 horizontal lines in (B) indicate the means. ○: masu salmon, ●: cherry salmon.

382

## 383 **Morphological and histological analysis of the hearts from masu** 384 **and cherry salmon**

385 To investigate the cause underlying the different ventricular diastolic properties between the  
386 masu and cherry salmon, hearts from these fishes were morphologically and histologically  
387 examined. At 29–30 mpf, the ventricles of both fish displayed a pyramidal shape (Fig 3A and  
388 3B). The heart mass of cherry salmon was approximately 11 times greater than that of masu  
389 salmon (Table 1). The juvenile ventricles at 6 mpf also exhibited pyramidal shapes (S1D and  
390 S1E Fig). We then observed the Elastica van Gieson-stained and hematoxylin and eosin-stained  
391 sections of masu and cherry salmon hearts (Fig 3C–J and S6 Fig). Their ventricles had at least  
392 two layers of myocardium, i.e., a compact layer and a spongy layer (Fig 3C, 3D, 3G, and 3H).  
393 The compact layer in the myocardium of cherry salmon had more coronary vessels compared  
394 with that in masu salmon (Fig 3D and 3H). Further, this layer was thicker in cherry salmon  
395 than that in masu salmon (Fig 3D and 3H), and the ratios of the compact layer area to the total  
396 ventricular area on sagittal heart slices were significantly different between masu ( $28.95\% \pm$   
397  $5.14\%$ ) and cherry salmon ( $39.56\% \pm 2.50\%$ ;  $p = 0.0387$ , Fig 3K). The cell density in the  
398 compact layer was  $6297.3 \pm 762.4$  and  $6733.7 \pm 1020.7$  nuclei/mm<sup>2</sup> in masu and cherry salmon,  
399 respectively, and there was no significant difference between masu and cherry salmon ( $p =$   
400  $0.3177$ , Fig 3L).

401

### 402 **Fig 3. Histological analysis of masu and cherry salmon hearts**

403 (A, B) Representative images of masu (A) and cherry (B) salmon hearts 29 months post  
404 fertilization (mpf). At: atrium, V: ventricle, Ba: bulbus arteriosus. (C–J) Elastica van Gieson  
405 staining images of the sagittal sections of the hearts of masu and cherry salmon 29 mpf. (C, G)  
406 Images of the whole hearts. (D, H) Magnified images of the ventricles. Black double arrows  
407 indicate the thickness of the compact layer. Black arrowheads indicate coronary vessels. (E, I)  
408 Higher magnification images of the compact layers. (F, J) Higher magnification images of the  
409 spongy layers. Collagen fibers: bright red; cytoplasm: yellow; elastic fibers: purple-black;

410 nuclei: dark black. Cl: compact layer, Sl: spongy layer. Scale bars = 1 cm in (A) and (B); 5 mm  
411 in (C) and (G); 1 mm in (D) and (H); 100  $\mu$ m in (E), (I), (F), and (J). (K) Percentage compact  
412 layer in the sagittal ventricle sections; masu salmon ( $28.95\% \pm 5.14\%$ , N = 4), cherry salmon  
413 ( $39.56\% \pm 2.50\%$ , N = 3). (L) The number of nuclei per yellow area in the compact layer; masu  
414 salmon ( $6297.3 \pm 762.4$  nuclei/mm<sup>2</sup>, N = 10), cherry salmon ( $6733.7 \pm 1020.7$  nuclei/mm<sup>2</sup>, N  
415 = 10). (M) The collagen fiber area percentage in the compact layer; masu salmon ( $1.492\% \pm$   
416  $0.932\%$ , N = 10), cherry salmon ( $5.768\% \pm 2.708\%$ , N = 10). Bar graphs and error bars indicate  
417 the means and standard deviations, respectively. ○: masu salmon, ●: cherry salmon.

418

419 The extracellular matrix is one of the parameters used to adjust tissue compliance. For  
420 example, elastin is an extracellular matrix that provides tissues with high levels of elasticity  
421 [79]. Bulbus arteriosus is an elastin-rich tissue [80] and stains purple–black with Elastica van  
422 Gieson staining (Fig 3C and 3G). The collagen fibers were tinted an intense red with Elastica  
423 van Gieson staining. Investigation of the heart sections of masu and cherry salmon revealed  
424 that the compact and spongy layers included collagen fibers (Fig 3E, 3F, 3I and 3J). The  
425 epicardium, which is the outermost layer of the heart, the area around the coronary vessels, and  
426 the contact areas of the compact and spongy layers were found to be rich in collagen fibers (Fig  
427 3D and 3H). The collagen fibers occupied  $1.492\% \pm 0.932\%$  of the compact layer in the  
428 ventricles from masu salmon and  $5.768\% \pm 2.708\%$  of the compact layer in the ventricles from  
429 cherry salmon, and the latter exhibited a significant accumulation of collagen fibers ( $p =$   
430  $0.0003$ , Fig 3M).

431 Hypertrophy of the ventricular wall in response to hypertrophic cardiomyopathy is one  
432 of the factors that impairs the diastolic function of ventricles [81, 82]. Importantly, hypertrophy  
433 of the ventricular tissue is sometimes accompanied by an increase in cardiomyocyte size [83].  
434 Mammalian cardiomyocytes become larger and maturate via multinucleation and

435 polyploidization after birth [84, 85]. To investigate whether cell hypertrophy is involved in  
436 heart growth, the cardiomyocytes of masu and cherry salmon were isolated, and their  
437 morphologies were analyzed. Most of the isolated cells that were attached to the dish showed  
438 spindle or rectangular shapes (Fig 4A and 4B). These cells were stained in a band pattern using  
439 the cardiomyocyte marker  $\alpha$ -actinin 2 (S7A–D Fig). Smaller and round-shaped cells were  
440 negative for  $\alpha$ -actinin 2 (S7E and S7F Fig). The longitudinal length and area of the cultured  
441 primary cardiomyocytes were not significantly different between masu ( $56.30 \pm 18.78 \mu\text{m}$  and  
442  $559.07 \pm 238.92 \mu\text{m}^2$ ) and cherry salmon ( $57.63 \pm 19.75 \mu\text{m}$  and  $518.41 \pm 197.03 \mu\text{m}^2$ ;  $p =$   
443  $0.7259$  and  $p = 0.3510$ ; Fig 4C and 4D, respectively). In these primary culture experiments, we  
444 found one binucleated cardiomyocyte in cherry salmon, and the rest of the cardiomyocytes  
445 were mononucleated (S8 Fig).

446

#### 447 **Fig 4. Morphology and sizes of the isolated cardiomyocytes**

448 (A, B) Representative bright-field images of the primary cultured cardiomyocytes of masu and  
449 cherry salmon 29 months post fertilization. Scale bars =  $20 \mu\text{m}$ . (C) Length of the long axis of  
450 the isolated cardiomyocytes; masu salmon ( $56.30 \pm 18.78 \mu\text{m}$ ,  $N = 55$ ), cherry salmon ( $57.63$   
451  $\pm 19.75 \mu\text{m}$ ,  $N = 50$ ). (D) Area of the isolated cardiomyocytes; masu salmon ( $559.07 \pm 238.92$   
452  $\mu\text{m}^2$ ,  $N = 55$ ), cherry salmon ( $518.41 \pm 197.03 \mu\text{m}^2$ ,  $N = 50$ ). Lines and error bars indicate the  
453 mean  $\pm$  standard deviation.  $\circ$ : masu salmon,  $\bullet$ : cherry salmon.

454

#### 455 **Connectin expression patterns in the hearts of masu and cherry** 456 **salmon**

457 The expression patterns of connectin isoforms affect ventricular diastolic function [30, 35-37];  
458 these patterns are regulated by thyroid hormone in mammals [86]. In *O. masou*, increased  
459 secretion of this hormone induces downstream migratory behavior and smoltification [69, 72].

460 From these assumptions, we hypothesized that masu and cherry salmon exhibit different  
461 expression patterns for cardiac Connectin isoforms. To investigate the cardiac Connectin  
462 expression patterns, SDS-agarose gel electrophoresis was performed (Fig 5A). Band pattern  
463 analysis of the CBB-stained gel revealed the presence of two peaks in the  $\alpha$ -connectin (T1)  
464 zone, indicating expression of intact Connectin in the ventricles of both masu and cherry  
465 salmon (Fig 5B); furthermore, western blotting with the anti-connectin antibody [78]  
466 confirmed that these bands corresponded to the connectin from masu and cherry salmon (S9  
467 Fig). These results suggest that *O. masou* at 29–30 mpf expressed Connectin (~3,700 kDa) in  
468 their ventricles and that there was no difference in the expression pattern of Connectin between  
469 masu and cherry salmon.

470

471 **Fig 5. Molecular weights of the Connectin isoforms and sarcomere lengths in the hearts**  
472 **of masu and cherry salmon**

473 (A) A representative Coomassie Brilliant Blue (CBB)-stained gel image. Lanes 2–7 show the  
474 molecular weights of the Connectin isoforms in the atrium, ventricle, and bulbus arteriosus of  
475 masu salmon (Ma) and cherry salmon (Ch). The following samples were used as molecular  
476 weight standards: a major Connectin isoform in zebrafish heart (Zf, 3500 kDa) in lane 8;  
477 Connectin N2A isoform from the skeletal muscles of mice (M1, 3700 kDa) in lanes 1 and 10;  
478 the Connectin N2B isoform expressed in the left ventricle of mice (M2, 3000 kDa) in lane 9.  
479  $\alpha$ -connectin (T1) and  $\beta$ -connectin (T2) indicate an intact Connectin and its degraded product,  
480 respectively. MHC indicates Myosin heavy chain (molecular weight ~220 kDa each), which  
481 was used as a loading control. (B) Electropherogram of lanes 2–7 of the CBB-stained gel in  
482 (A). Black arrowheads indicate the band peaks for the ventricles of masu and cherry salmon in  
483 the  $\alpha$ -connectin zone. (C–F) Representative transmission electron microscopy images of the  
484 cross-sections and longitudinal sections in the ventricular sarcomeres of masu and cherry

485 salmon 29 months post fertilization. Insets of (C, E) showing higher magnification images of  
486 the cross-sections of myofibril bundles. Scale bars = 500 nm in (C) and (E) and 1  $\mu\text{m}$  in (D)  
487 and (F). (G) The ventricular sarcomere lengths of the z-line to z-line in the ventricles of masu  
488 salmon ( $2.06 \pm 0.08 \mu\text{m}$ , N = 42) and cherry salmon ( $2.05 \pm 0.11 \mu\text{m}$ , N = 90). A black double  
489 arrow indicates sarcomere length. Lines and error bars indicate the means  $\pm$  standard  
490 deviations.  $\circ$ : masu salmon,  $\bullet$ : cherry salmon.

491

492 The TEM images of heart tissues from the masu and cherry salmon were observed and  
493 the length of the sarcomeres was measured (Fig 5C–G and S10A–E Fig). The sarcomere length  
494 of the ventricular myocardium did not vary significantly between the masu ( $2.06 \pm 0.08 \mu\text{m}$ )  
495 and cherry salmon ( $2.05 \pm 0.11 \mu\text{m}$ ;  $p = 0.8177$ , Fig 5G). Similarly, the sarcomere length of  
496 the atrial myocardium also did not vary significantly between the masu ( $2.13 \pm 0.16 \mu\text{m}$ ) and  
497 cherry salmon ( $2.12 \pm 0.11 \mu\text{m}$ ;  $p = 0.7353$ , S7E Fig). In other words, the sarcomere lengths  
498 of the masu and cherry salmon under resting tension were similar. The bulbus arteriosus of the  
499 teleosts is mainly composed of abundant extracellular matrixes and smooth muscle cells [87-  
500 89]. Moreover, microfilaments and collagen fibers were observed in the bulbus arteriosus of  
501 both the masu and cherry salmon (S10F–H Fig) [90].

502

## 503 **Discussion**

### 504 **Differing ventricular diastolic hemodynamics in masu and cherry**

#### 505 **salmon**

506 In this study, pulsed-wave Doppler echocardiography revealed that landlocked masu salmon  
507 and sea-run cherry salmon have different ventricular diastolic properties despite being the same  
508 age and members of the same species. In masu salmon, monophasic atrioventricular inflow  
509 waveforms were observed immediately after the P wave in the electrocardiograph (Fig 1C),  
510 and therefore, these inflows may be attributed to atrial contraction. Simultaneous measurement  
511 of atrial and ventricular pressures showed that the atrial-ventricular pressure gradient occurred  
512 during atrial systole but not the early diastolic phase between completion of ventricular ejection  
513 and atrial systole (S4 Fig). These results suggested that there was no ventricular suction of  
514 blood from the atrium in masu salmon. Conversely, cherry salmon mainly displayed two types  
515 of atrioventricular inflow patterns, which were e/a fused and biphasic waveforms, depending  
516 on the heart rate (Fig 1D and 1E, S4 Fig). The inflows observed before detecting the P wave  
517 indicated passive ventricular filling, suggesting that the ventricle in cherry salmon acquired the  
518 ability to suction blood from the atrium. However, the atrial systolic velocity was greater than  
519 the early diastolic velocity (Fig 1F, E/A ratio =  $0.48 \pm 0.06$ ); therefore, it was clear that atrial  
520 contraction plays a dominant role in ventricular filling in cherry salmon, at least under  
521 anesthesia.

522 A negative correlation has been reported between body mass and resting heart rate in  
523 both mammals and birds [91, 92], but this rule does not always apply to fish [93]. However, in  
524 our study, at 29–30 mpf, cherry salmon was over 10 times heavier than masu salmon (Table  
525 1), and the heart rate of masu salmon was placed higher than that of cherry salmon (S1 Table,  
526  $p = 0.0164$ ). A previous hemodynamic study of rainbow trout had suggested that the heart rate

527 is associated with the appearance of monophasic or biphasic atrioventricular inflow waveforms  
528 [94]. Pulsed-wave Doppler echocardiography of rainbow trout recorded biphasic waveforms  
529 in specimens with a low heart rate (44–69 bpm) [94]. In cherry salmon, monophasic  
530 atrioventricular inflow switched to biphasic when the R-R interval times extended, but the time  
531 duration between the end of ventricular ejection and the onset of new inflow was constant at  
532 92–96 ms, independent of the R-R interval time (S4 Fig). In comparison, the lower heart rate  
533 cherry salmon had longer ventricular diastole, and the event of ventricular filling of blood  
534 occurred before atrial contraction began; however, no biphasic inflow waveform was observed  
535 in masu salmon, even though the time duration from ventricular ejection to the onset of  
536 atrioventricular inflow increased. However, since juvenile Atlantic salmon of 15 g body weight  
537 showed biphasic waveforms [95], it is possible that our data of pulsed-wave Doppler  
538 echocardiography are *O. masou*-specific. Elastic reaction forces, muscle contraction, and  
539 differences in chamber size between the atria and ventricles have been considered as candidates  
540 for the driving forces of ventricular filling, but they have not been sufficiently understood yet  
541 [96, 97]. Our study revealed that the same species of fish adapted to different environments,  
542 river and sea, acquired different ventricular filling systems during diastole. Thus, histological  
543 and material changes in the ventricles of cherry salmon might have contributed to generating  
544 the early diastolic ventricular inflow (Figs 2 and 3).

545

## 546 **Relative ventricular stiffness index greater in cherry salmon than** 547 **masu salmon**

548 The mechanical properties of ventricles of different sizes cannot simply be evaluated by  
549 comparing the individual mechanical parameters [4]. To assess ventricular contraction, end-  
550 systolic pressure–volume analysis had been carried out by normalizing ventricular volume per  
551 myocardial mass with respect to its contraction indexes [98]. EDPVR analysis, based on a time-



552 varying elastance model, is an important method to assess ventricular stiffness [4]; however,  
553 its application in comparing the stiffness of ventricles of different sizes is difficult. In a smaller  
554 ventricle, the ratio of the pressure increase relative to the volume increase is greater than for a  
555 larger one. Thus, the EDPVR curve for a smaller heart would be steeper than that for a larger  
556 ventricle, even with the same actual stiffness. In this study, to evaluate the relative ventricular  
557 stiffness of masu and cherry salmon, we calculated the stiffness per unit of myocardial mass  
558 by normalizing the ventricular end-diastolic volume by the ventricular mass [15]. The index of  
559 ventricular stiffness per unit myocardial mass of cherry salmon, calculated from the normalized  
560 EDPVR curve (Fig 2A), was significantly higher than that of masu salmon (Fig 2B), thus  
561 suggesting that the ventricle of cherry salmon has a relatively suppressed diastolic function.

562         The ventricular walls of cherry salmon were thickened, and its coronary vascular  
563 network was well developed, as compared to those of masu salmon (Fig 3D and 3H). According  
564 to Laplace's law, the thicker the ventricular wall, the greater the wall tension generated in  
565 response to increased internal pressure, and the greater the ventricular stiffness. Physiological  
566 hypertrophy in the ventricular wall, which causes both stroke volume and systolic pressure to  
567 increase, improved the overall cardiac output [99, 100]. Therefore, despite the expected high  
568 performance of cherry salmon hearts, their ventricles were stiffer than those of masu salmon  
569 (Fig 2). Coronary circulation presents hemodynamic characteristics that are not observed in  
570 other organs: during ventricular systole, arterial blood flow is blocked because of the pressure  
571 associated with contraction, while during diastole, blood flows only after the percutaneous  
572 pressure is reduced. Therefore, excessive stretching of the coronary vessels associated with  
573 ventricular dilation increases vascular resistance and decreases blood supply to myocardial  
574 tissues. Thus, the stiffening of the ventricle in cherry salmon might support the coronary vessel  
575 shapes and set the upper threshold for stroke volume to avoid excessive ventricular filling to  
576 supply sufficient amounts of arterial blood to the myocardium through the coronary network.

577

## 578 **Collagen accumulation in the thick compact layer of cherry salmon**

579 In this study, histological analysis provided the causes of ventricular stiffness. The ventricle of  
580 cherry salmon had a thicker compact layer compared to that of masu salmon (Fig. 3D, 3H, 3K).  
581 This is consistent with previous reports on other salmonids wherein the compact layer thickens  
582 with growth [56, 57]. This histological change indicates that the growth ratio of the compact  
583 and sponge layers was different during the growth process of the masu and cherry salmon.  
584 There were no differences in the morphology and nuclear number of each isolated  
585 cardiomyocyte between the masu and cherry salmon (Fig 4; S7 and S8 Figs). Therefore *O.*  
586 *masou* hearts may show growth because of proliferation of cardiomyocytes or the  
587 differentiation of progenitor and stem cells instead of cardiomyocyte hypertrophy.

588 The compact layer of cherry salmon also contained more collagen fibers as compared  
589 with masu salmon (Fig 3E, 3I, and 3M). Increased stiffness in the ventricle correlates with  
590 tissue fibrosis [66, 101], and is reportedly induced by collagen accumulation in the  
591 myocardium [102]. In a rainbow trout study, breeding at lower temperatures was found to  
592 reduce ventricular compliance mediated by accumulating collagen fibers but not because of  
593 hypertrophy of the compact layer [65]. Hence, the stiffening of the ventricle in cherry salmon  
594 is assumed to be strongly correlated to increasing collagen fiber content in the compact layer.

595

## 596 **Similar expression patterns of Connectin isoforms in the ventricles** 597 **of masu and cherry salmon**

598 The expression ratios of the Connectin isoforms affect cell passive tension [30, 35-37]. The  
599 mammalian heart expresses the lower-molecular-weight Connectin isoform N2B and the  
600 higher-molecular-weight Connectin isoform N2BA [31-33]. Rainbow trout express N2B-like

601 and N2BA-like proteins in their hearts [103]. Multiple *connectin* splicing variants are  
602 reportedly expressed in zebrafish [104]. The SDS-agarose gel electrophoresis in this study  
603 expected the expression of two types of Connectins in the ventricles of the masu and cherry  
604 salmon (Fig 5A and 5B); however, western blotting could not discriminate between these  
605 Connectins because either one of the isoforms might not have been detected by the antibody  
606 used in this study (S10 Fig). The similarity in the expression pattern of Connectins in the  
607 ventricles of cherry and masu salmon indicated that the difference in ventricular stiffness was  
608 not because of regulation by splicing of connectin molecules. There was no difference in  
609 sarcomere length under unloaded conditions as assessed by TEM (Fig 5C–G). However, the  
610 correlation between the molecular sizes of Connectins and sarcomere length is controversial  
611 [105, 106]. Although the regulation of tensile strength by Connectin phosphorylation is a  
612 possible mechanism other than the expression of its isoforms [27], we did not analyze it. In  
613 addition, we did not identify the gene and amino acid sequence of the Connectins. Salmon have  
614 undergone four genome duplication events during their speciation, and consequently, their  
615 genomic DNA sequences are extremely complex and difficult to analyze [107-109]; however,  
616 recently, the complete genome of the Atlantic salmon was sequenced [79]. *O. masou* is also  
617 assumed to have a complex genome, but its genomic DNA sequences have been gradually  
618 deciphered, and comprehensive gene expression analysis is being attempted [110].

619 In our experiment, we used *O. masou* of the same age but did not consider sex because  
620 it could not be specified at the time of purchase; however, previously, differences between  
621 male and female wild-type zebrafish strains at 9 mpf were reported when considering heart  
622 morphology, heart rate, and cardiac function parameters [111]; furthermore, rainbow trout have  
623 been found to differ based on sex in the amount of connective tissues in their ventricles [112].  
624 We used non-strained *O. masou* with non-uniform genetic backgrounds in this study, but a  
625 rigorous experimental system with a molecular basis is needed to provide definite answers to

626 questions regarding the processes of heart development, morphogenesis, functions, and gene  
627 expression patterns.

## 628 **Conclusion**

629 In this study, the properties of ventricular diastole and heart histology were analyzed in  
630 landlocked masu and sea-run cherry salmon at 29–30 mpf. Because cherry salmon had thick  
631 ventricular walls and accumulated collagen in the myocardium, their ventricles were found to  
632 be stiffer than those of masu salmon on a per unit myocardial mass basis. Histological  
633 adaptations of the heart because of body growth and the living environment cause  
634 hemodynamic changes in *O. masou*, and the atrioventricular inflows of cherry salmon showed  
635 biphasic waveforms with the early diastolic filling and the atrial contraction. Our study is  
636 expected to provide evidence of the vertebrate ventricle acquiring its suction function by  
637 modulating the stiffness of the myocardium and changing the ventricular filling system during  
638 development, environmental change, speciation, and evolution.

639

640

## 641 **Acknowledgments**

642 The contributing authors would like to thank Nobuhisa Iwachido (Kawasaki Medical School,  
643 Japan) for their technical assistance with the tissue staining and Nobuaki Matsuda (Kawasaki  
644 Medical School, Japan) for operating the electron microscope. The authors would like to thank  
645 Editage for English language editing.

646

## 647 **References**

- 648 1. Nagueh SF. Left Ventricular Diastolic Function: Understanding Pathophysiology,  
649 Diagnosis, and Prognosis With Echocardiography. *JACC Cardiovasc Imaging*.  
650 2020;13(1 Pt 2):228-44. <https://doi.org/10.1016/j.jcmg.2018.10.038> PMID: 30982669
- 651 2. Salmasi AM, Alimo A, Jepson E, Dancy M. Age-associated changes in left  
652 ventricular diastolic function are related to increasing left ventricular mass. *Am J*  
653 *Hypertens*. 2003;16(6):473-7. [https://doi.org/10.1016/s0895-7061\(03\)00846-x](https://doi.org/10.1016/s0895-7061(03)00846-x) PMID:  
654 12799096
- 655 3. Lee SL, Daimon M, Di Tullio MR, Homma S, Nakao T, Kawata T, et al. Relationship  
656 of Left Ventricular Diastolic Function to Obesity and Overweight in a Japanese  
657 Population With Preserved Left Ventricular Ejection Fraction. *Circ J*.  
658 2016;80(9):1951-6. <https://doi.org/10.1253/circj.CJ-16-0381> PMID: 27385498
- 659 4. Burkhoff D, Mirsky I, Suga H. Assessment of systolic and diastolic ventricular  
660 properties via pressure-volume analysis: a guide for clinical, translational, and basic  
661 researchers. *Am J Physiol Heart Circ Physiol*. 2005;289(2):H501-12.  
662 <https://doi.org/10.1152/ajpheart.00138.2005> PMID: 16014610
- 663 5. Appleton CP, Hatle LK, Popp RL. Relation of transmitral flow velocity patterns to  
664 left ventricular diastolic function: new insights from a combined hemodynamic and  
665 Doppler echocardiographic study. *J Am Coll Cardiol*. 1988;12(2):426-40.  
666 [https://doi.org/10.1016/0735-1097\(88\)90416-0](https://doi.org/10.1016/0735-1097(88)90416-0) PMID: 3392336
- 667 6. Starling EH. The Linacre Lecture on the Law of the Heart, Given at Cambridge, 1915.  
668 *Nature*. 1918;101(2525):43-43. <https://doi.org/10.1038/101043a0>
- 669 7. Sequeira V, van der Velden J. Historical perspective on heart function: the Frank-  
670 Starling Law. *Biophys Rev*. 2015;7(4):421-47. [https://doi.org/10.1007/s12551-015-](https://doi.org/10.1007/s12551-015-0184-4)  
671 [0184-4](https://doi.org/10.1007/s12551-015-0184-4) PMID: 28510104

- 672 8. Frank O. Zur Dynamik des Herzmuskels. Z Biol. 1895;32:370-447.  
673 <https://ci.nii.ac.jp/naid/10008300348/en/>
- 674 9. Burch GE, Cronvich JA, Creech O, Hyman A. Pressure-volume diagrams of the left  
675 ventricle of man; a preliminary report. Am Heart J. 1957;53(6):890-4.  
676 [https://doi.org/10.1016/0002-8703\(57\)90325-3](https://doi.org/10.1016/0002-8703(57)90325-3) PMID: 13424469
- 677 10. Hiroyuki S. Time Course of Left Ventricular Pressure-Volume Relationship under  
678 Various Enddiastolic Volume. Japanese Heart Journal. 1969;10(6):509-15.  
679 <https://doi.org/10.1536/ihj.10.509> PMID: 5308142
- 680 11. Suga H, Sagawa K. Instantaneous pressure-volume relationships and their ratio in the  
681 excised, supported canine left ventricle. Circ Res. 1974;35(1):117-26.  
682 <https://10.1161/01.res.35.1.117> PMID: 4841253
- 683 12. Honda T, Ujihara Y, Hanashima A, Hashimoto K, Tanemoto K, Mohri S. Turtle  
684 spongy ventricles exhibit more compliant diastolic property and possess larger  
685 elastic regions of connectin in comparison to rat compact left ventricles. Kawasaki  
686 Medical Journal. 2018;44(1):1-17. [https://doi.org/doi:10.11482/KMJ-E44\(1\)1](https://doi.org/doi:10.11482/KMJ-E44(1)1)
- 687 13. Peterson KL, Tsuji J, Johnson A, DiDonna J, LeWinter M. Diastolic left ventricular  
688 pressure-volume and stress-strain relations in patients with valvular aortic stenosis  
689 and left ventricular hypertrophy. Circulation. 1978;58(1):77-89.  
690 <https://doi.org/10.1161/01.cir.58.1.77> PMID: 148335
- 691 14. Mirsky I, Pasipoularides A. Elastic properties of normal and hypertrophied cardiac  
692 muscle. Fed Proc. 1980;39(2):156-61.  
693 <https://www.ncbi.nlm.nih.gov/pubmed/6444389> PMID: 6444389
- 694 15. Mitsuyama S, Takeshita D, Obata K, Zhang GX, Takaki M. Left ventricular  
695 mechanical and energetic changes in long-term isoproterenol-induced hypertrophied



- 696 hearts of SERCA2a transgenic rats. *J Mol Cell Cardiol.* 2013;59:95-106.  
697 <http://10.1016/j.yjmcc.2013.02.012> PMID: 23458361
- 698 16. Klotz S, Hay I, Dickstein ML, Yi GH, Wang J, Maurer MS, et al. Single-beat  
699 estimation of end-diastolic pressure-volume relationship: a novel method with  
700 potential for noninvasive application. *Am J Physiol Heart Circ Physiol.*  
701 2006;291(1):H403-12. <http://10.1152/ajpheart.01240.2005> PMID: 16428349
- 702 17. Maruyama K. Connectin, an elastic protein from myofibrils. *J Biochem.*  
703 1976;80(2):405-7. <https://doi.org/10.1093/oxfordjournals.jbchem.a131291> PMID:  
704 1002676
- 705 18. Maruyama K, Kimura S, Kuroda M, Handa S. Connectin, an elastic protein of muscle.  
706 Its abundance in cardiac myofibrils. *J Biochem.* 1977;82(2):347-50.  
707 <https://www.ncbi.nlm.nih.gov/pubmed/914785> PMID: 914785
- 708 19. Maruyama K, Natori R, Nonomura Y. New elastic protein from muscle. *Nature.*  
709 1976;262(5563):58-60. <https://doi.org/10.1038/262058a0> PMID: 934326
- 710 20. Wang K, McClure J, Tu A. Titin: major myofibrillar components of striated muscle.  
711 *Proc Natl Acad Sci U S A.* 1979;76(8):3698-702.  
712 <https://doi.org/10.1073/pnas.76.8.3698> PMID: 291034
- 713 21. Linke WA, Popov VI, Pollack GH. Passive and active tension in single cardiac  
714 myofibrils. *Biophys J.* 1994;67(2):782-92. [https://doi.org/10.1016/S0006-  
715 3495\(94\)80538-7](https://doi.org/10.1016/S0006-3495(94)80538-7) PMID: 7948691
- 716 22. Granzier HL, Wang K. Interplay between passive tension and strong and weak  
717 binding cross-bridges in insect indirect flight muscle. A functional dissection by  
718 gelsolin-mediated thin filament removal. *J Gen Physiol.* 1993;101(2):235-70.  
719 <https://doi.org/10.1085/jgp.101.2.235> PMID: 7681097

- 720 23. Granzier HL, Irving TC. Passive tension in cardiac muscle: contribution of collagen,  
721 titin, microtubules, and intermediate filaments. *Biophys J*. 1995;68(3):1027-44.  
722 [https://doi.org/10.1016/S0006-3495\(95\)80278-X](https://doi.org/10.1016/S0006-3495(95)80278-X) PMID: 7756523
- 723 24. Labeit S, Kolmerer B. Titins: giant proteins in charge of muscle ultrastructure and  
724 elasticity. *Science*. 1995;270(5234):293-6.  
725 <https://doi.org/10.1126/science.270.5234.293> PMID: 7569978
- 726 25. Bang ML, Centner T, Fornoff F, Geach AJ, Gotthardt M, McNabb M, et al. The  
727 complete gene sequence of titin, expression of an unusual approximately 700-kDa  
728 titin isoform, and its interaction with obscurin identify a novel Z-line to I-band linking  
729 system. *Circ Res*. 2001;89(11):1065-72. <https://doi.org/10.1161/hh2301.100981>  
730 PMID: 11717165
- 731 26. Watanabe K, Nair P, Labeit D, Kellermayer MS, Greaser M, Labeit S, et al.  
732 Molecular mechanics of cardiac titin's PEVK and N2B spring elements. *J Biol Chem*.  
733 2002;277(13):11549-58. <https://doi.org/10.1074/jbc.M200356200> PMID: 11799131
- 734 27. Yamasaki R, Wu Y, McNabb M, Greaser M, Labeit S, Granzier H. Protein kinase A  
735 phosphorylates titin's cardiac-specific N2B domain and reduces passive tension in rat  
736 cardiac myocytes. *Circ Res*. 2002;90(11):1181-8.  
737 <https://doi.org/10.1161/01.res.0000021115.24712.99> PMID: 12065321
- 738 28. LeWinter MM, Granzier HL. Titin Is a Major Human Disease Gene. *Circulation*.  
739 2013;127(8):938-44. <https://doi.org/10.1161/CIRCULATIONAHA.112.139717>  
740 PMID: 23439446
- 741 29. Linke WA, Hamdani N. Gigantic business: titin properties and function through thick  
742 and thin. *Circ Res*. 2014;114(6):1052-68.  
743 <https://doi.org/10.1161/CIRCRESAHA.114.301286> PMID: 24625729

- 744 30. Freiburg A, Trombitas K, Hell W, Cazorla O, Fougerousse F, Centner T, et al. Series  
745 of exon-skipping events in the elastic spring region of titin as the structural basis for  
746 myofibrillar elastic diversity. *Circ Res.* 2000;86(11):1114-21.  
747 <https://doi.org/10.1161/01.res.86.11.1114> PMID: 10850961
- 748 31. Opitz CA, Leake MC, Makarenko I, Benes V, Linke WA. Developmentally regulated  
749 switching of titin size alters myofibrillar stiffness in the perinatal heart. *Circ Res.*  
750 2004;94(7):967-75. <https://doi.org/10.1161/01.RES.0000124301.48193.E1> PMID:  
751 14988228
- 752 32. Lahmers S, Wu Y, Call DR, Labeit S, Granzier H. Developmental control of titin  
753 isoform expression and passive stiffness in fetal and neonatal myocardium. *Circ Res.*  
754 2004;94(4):505-13. <https://doi.org/10.1161/01.RES.0000115522.52554.86> PMID:  
755 14707027
- 756 33. Greaser ML, Krzesinski PR, Warren CM, Kirkpatrick B, Campbell KS, Moss RL.  
757 Developmental changes in rat cardiac titin/connectin: transitions in normal animals  
758 and in mutants with a delayed pattern of isoform transition. *J Muscle Res Cell Motil.*  
759 2005;26(6-8):325-32. <https://doi.org/10.1007/s10974-005-9039-0> PMID: 16491431
- 760 34. Warren CM, Krzesinski PR, Campbell KS, Moss RL, Greaser ML. Titin isoform  
761 changes in rat myocardium during development. *Mech Dev.* 2004;121(11):1301-12.  
762 <https://doi.org/10.1016/j.mod.2004.07.003> PMID: 15454261
- 763 35. Trombitas K, Wu Y, Labeit D, Labeit S, Granzier H. Cardiac titin isoforms are  
764 coexpressed in the half-sarcomere and extend independently. *Am J Physiol Heart Circ*  
765 *Physiol.* 2001;281(4):H1793-9. <https://doi.org/10.1152/ajpheart.2001.281.4.H1793>  
766 PMID: 11557573

- 767 36. LeWinter MM, Granzier H. Cardiac titin: a multifunctional giant. *Circulation*.  
768 2010;121(19):2137-45. <https://doi.org/10.1161/CIRCULATIONAHA.109.860171>  
769 PMID: 20479164
- 770 37. Cazorla O, Freiburg A, Helmes M, Centner T, McNabb M, Wu Y, et al. Differential  
771 expression of cardiac titin isoforms and modulation of cellular stiffness. *Circ Res*.  
772 2000;86(1):59-67. <https://doi.org/10.1161/01.res.86.1.59> PMID: 10625306
- 773 38. Nawar G. On the anatomy of clarias lazera. *Journal of Morphology*. 1954;94(3):551-  
774 85. <https://doi.org/10.1002/jmor.1050940304>
- 775 39. Saxena DB, Bakhshi PL. Cardio-Vascular System of Some Fishes of the Torrential  
776 Streams in India. Part I. Heart of *Orienes plagiostomus plagiostomus* and *Botia birdi*.  
777 *Japanese Journal of Ichthyology*. 1965;12(3-6):70-81.  
778 <https://doi.org/10.11369/jji1950.12.70>
- 779 40. Randall DJ. Functional morphology of the heart in fishes. *Am Zool*. 1968;8(2):179-  
780 89. <https://doi.org/10.1093/icb/8.2.179> PMID: 5738636
- 781 41. Farrell AP, Jones DR. 1 - The Heart. In: Hoar WS, Randall DJ, Farrell AP, editors.  
782 *Fish Physiology*. 12: Academic Press; 1992. p. 1-88.
- 783 42. Pieperhoff S, Bennett W, Farrell AP. The intercellular organization of the two  
784 muscular systems in the adult salmonid heart, the compact and the spongy  
785 myocardium. *J Anat*. 2009;215(5):536-47. [https://doi.org/10.1111/j.1469-  
786 7580.2009.01129.x](https://doi.org/10.1111/j.1469-7580.2009.01129.x) PMID: 19627390
- 787 43. Davie PS, Farrell AP. The coronary and luminal circulations of the myocardium of  
788 fishes. *Canadian Journal of Zoology*. 1991;69(7):1993-2001.  
789 <https://doi.org/10.1139/z91-278>

- 790 44. Tota B. Vascular and metabolic zonation in the ventricular myocardium of mammals  
791 and fishes. *Comp Biochem Physiol A Comp Physiol*. 1983;76(3):423-37.  
792 [https://doi.org/10.1016/0300-9629\(83\)90442-5](https://doi.org/10.1016/0300-9629(83)90442-5) PMID: 6139219
- 793 45. Tota B, Cimini V, Salvatore G, Zummo G. Comparative study of the arterial and  
794 lacunary systems of the ventricular myocardium of elasmobranch and teleost fishes.  
795 *Am J Anat*. 1983;167(1):15-32. <https://doi.org/10.1002/aja.1001670103> PMID:  
796 6869307
- 797 46. Tota B. Myoarchitecture and vascularization of the elasmobranch heart ventricle.  
798 *Journal of Experimental Zoology*. 1989;252(S2):122-35.  
799 <https://doi.org/10.1002/jez.1402520413>
- 800 47. Nelson J, Grande T, Wilson M. *Fishes of the World*. 5 ed. 2016.
- 801 48. Sherrill J, Weber ES, 3rd, Marty GD, Hernandez-Divers S. Fish cardiovascular  
802 physiology and disease. *Vet Clin North Am Exot Anim Pract*. 2009;12(1):11-38.  
803 <https://doi.org/10.1016/j.cvex.2008.08.002> PMID: 19131028
- 804 49. Sandblom E, Axelsson M. Venous hemodynamic responses to acute temperature  
805 increase in the rainbow trout (*Oncorhynchus mykiss*). *Am J Physiol Regul Integr*  
806 *Comp Physiol*. 2007;292(6):R2292-8. <https://doi.org/10.1152/ajpregu.00884.2006>  
807 PMID: 17322113
- 808 50. Farrell AP. Cardiorespiratory performance in salmonids during exercise at high  
809 temperature: insights into cardiovascular design limitations in fishes. *Comp Biochem*  
810 *Physiol A Mol Integr Physiol*. 2002;132(4):797-810. [https://doi.org/10.1016/s1095-](https://doi.org/10.1016/s1095-6433(02)00049-1)  
811 [6433\(02\)00049-1](https://doi.org/10.1016/s1095-6433(02)00049-1) PMID: 12095864
- 812 51. Currie S, Evans DH. *The Physiology of Fishes*. 5 th ed. Boca Raton: CRC Press;  
813 2020.

- 814 52. Claireaux G, McKenzie DJ, Genge AG, Chatelier A, Aubin J, Farrell AP. Linking  
815 swimming performance, cardiac pumping ability and cardiac anatomy in rainbow  
816 trout. *J Exp Biol.* 2005;208(Pt 10):1775-84. <https://doi.org/10.1242/jeb.01587> PMID:  
817 15879059
- 818 53. Poppe TT, Johansen R, Gunnes G, Torud B. Heart morphology in wild and farmed  
819 Atlantic salmon *Salmo salar* and rainbow trout *Oncorhynchus mykiss*. *Dis Aquat*  
820 *Organ.* 2003;57(1-2):103-8. <https://doi.org/10.3354/dao057103> PMID: 14735927
- 821 54. Agnisola C, Tota B. Structure and function of the fish cardiac ventricle: flexibility and  
822 limitations. *Cardioscience.* 1994;5(3):145-53.  
823 <https://www.ncbi.nlm.nih.gov/pubmed/7827250> PMID: 7827250
- 824 55. Tota B, Gattuso A. Heart ventricle pumps in teleosts and elasmobranchs: A  
825 morphodynamic approach. *Journal of Experimental Zoology.* 1996;275(2-3):162-71.  
826 [https://doi.org/10.1002/\(SICI\)1097-010X\(19960601/15\)275:2/3<162::AID-](https://doi.org/10.1002/(SICI)1097-010X(19960601/15)275:2/3<162::AID-)  
827 [JEZ8>3.0.CO;2-B](https://doi.org/10.1002/(SICI)1097-010X(19960601/15)275:2/3<162::AID-JEZ8>3.0.CO;2-B)
- 828 56. Poupa O, Gesser H, Jonsson S, Sullivan L. Coronary-supplied compact shell of  
829 ventricular myocardium in salmonids: growth and enzyme pattern. *Comp Biochem*  
830 *Physiol A Comp Physiol.* 1974;48(1):85-95. <https://doi.org/10.1016/0300->  
831 [9629\(74\)90856-1](https://doi.org/10.1016/0300-9629(74)90856-1) PMID: 4151635
- 832 57. Farrell AP, Hammons AM, Graham MS, Tibbits GF. Cardiac growth in rainbow trout,  
833 *Salmo gairdneri*. *Canadian Journal of Zoology.* 1988;66(11):2368-73.  
834 <https://doi.org/10.1139/z88-351>
- 835 58. Johansen IB, Lunde IG, Røsjø H, Christensen G, Nilsson GE, Bakken M, et al.  
836 Cortisol response to stress is associated with myocardial remodeling in salmonid  
837 fishes. *J Exp Biol.* 2011;214(Pt 8):1313-21. <https://doi.org/10.1242/jeb.053058>  
838 PMID: 21430209

- 839 59. Grethe R, Helge S, Sigurd E, FraserDylan. Offspring size effects vary over fine  
840 spatio-temporal scales in Atlantic salmon (*Salmo salar*). Canadian Journal of Fisheries  
841 and Aquatic Sciences. 2013;70(1):5-12. <https://doi.org/10.1139/cjfas-2012-0152>
- 842 60. Franklin CE, Davie PS. Sexual Maturity Can Double Heart Mass and Cardiac Power  
843 Output in Male Rainbow Trout. Journal of Experimental Biology. 1992;171(1):139-  
844 48. <https://doi.org/10.1242/jeb.171.1.139>
- 845 61. Clark RJ, Rodnick KJ. Morphometric and biochemical characteristics of ventricular  
846 hypertrophy in male rainbow trout (*Oncorhynchus mykiss*). J Exp Biol. 1998;201(Pt  
847 10):1541-52. <https://www.ncbi.nlm.nih.gov/pubmed/9556537> PMID: 9556537
- 848 62. Brijs J, Sandblom E, Dekens E, Näslund J, Ekström A, Axelsson M. Cardiac  
849 remodeling and increased central venous pressure underlie elevated stroke volume  
850 and cardiac output of seawater-acclimated rainbow trout. American Journal of  
851 Physiology-Regulatory, Integrative and Comparative Physiology. 2017;312(1):R31-  
852 R39. <https://doi.org/10.1152/ajpregu.00374.2016> PMID: 27903511
- 853 63. Farrell AP, Johansen JA, Suarez RK. Effects of exercise-training on cardiac  
854 performance and muscle enzymes in rainbow trout, *Oncorhynchus mykiss*. Fish  
855 Physiol Biochem. 1991;9(4):303-12. <https://doi.org/10.1007/BF02265151> PMID:  
856 24213727
- 857 64. Norstrud KS, Vindas MA, Nilsson GE, Johansen IB. Short-term cortisol exposure  
858 alters cardiac hypertrophic and non-hypertrophic signalling in a time-dependent  
859 manner in rainbow trout. Biol Open. 2018;7(12) <https://doi.org/10.1242/bio.037853>  
860 PMID: 30341103
- 861 65. Keen AN, Fenna AJ, McConnell JC, Sherratt MJ, Gardner P, Shiels HA. The  
862 Dynamic Nature of Hypertrophic and Fibrotic Remodeling of the Fish Ventricle.

- 863 Front Physiol. 2015;6:427. <https://doi.org/10.3389/fphys.2015.00427> PMID:  
864 26834645
- 865 66. Fomovsky GM, Thomopoulos S, Holmes JW. Contribution of extracellular matrix to  
866 the mechanical properties of the heart. J Mol Cell Cardiol. 2010;48(3):490-6.  
867 <https://doi.org/10.1016/j.yjmcc.2009.08.003> PMID: 19686759
- 868 67. Kato F. Life histories of masu and amago salmon (*Oncorhynchus masou* and  
869 *Oncorhynchus rhodurus*. Pacific Salmon Life Histories. 1991:446-520.  
870 <https://ci.nii.ac.jp/naid/10012483661/en/>
- 871 68. McPhail JD. The Origin and Speciation of *Oncorhynchus* Revisited. In: Stouder DJ,  
872 Bisson PA, Naiman RJ, editors. Pacific Salmon & their Ecosystems: Status and  
873 Future Options. Boston, MA: Springer US; 1997. p. 29-38.
- 874 69. Kazuhiro U, Akihiko H, Kohei Y. Serum thyroid hormone, guanine and protein  
875 profiles during smoltification and after thyroxine treatment in the masu salmon,  
876 *Oncorhynchus masou*. Comparative Biochemistry and Physiology Part A: Physiology.  
877 1994;107(4):607-12. [https://doi.org/10.1016/0300-9629\(94\)90359-X](https://doi.org/10.1016/0300-9629(94)90359-X)
- 878 70. Carruth LL, Jones RE, Norris DO. Cortisol and Pacific Salmon: A New Look at the  
879 Role of Stress Hormones in Olfaction and Home-stream Migration. Integrative and  
880 Comparative Biology. 2002;42(3):574-81. <https://doi.org/10.1093/icb/42.3.574>  
881 PMID: 21708753
- 882 71. Munakata A. Effects of growth hormone and cortisol on the downstream migratory  
883 behavior in masu salmon, *Oncorhynchus masou*. Gen Comp Endocrinol.  
884 2007;150(1):12-17. <https://doi.org/10.1016/j.yggen.2006.07.009> PMID: 16996063
- 885 72. Munakata A, Amano M, Ikuta K, Kitamura S, Aida K. Involvement of sex steroids  
886 and thyroid hormones in upstream and downstream behaviors in masu salmon,



- 887 Oncorhynchus masou. *Aquaculture*. 2012;362-363:158-66.
- 888 <https://doi.org/10.1016/j.aquaculture.2010.11.027>
- 889 73. Riley JP, Skirrow G, Chester R. *Chemical Oceanography*. 2 nd ed. London; New  
890 York: Academic Press; 1975.
- 891 74. Topic Popovic N, Strunjak-Perovic I, Coz-Rakovac R, Barisic J, Jadan M, Persin  
892 Berakovic A, et al. Tricaine methane-sulfonate (MS-222) application in fish  
893 anaesthesia. *Journal of Applied Ichthyology*. 2012;28(4):553-64.  
894 <https://doi.org/10.1111/j.1439-0426.2012.01950.x> PMID: 193048
- 895 75. Schindelin J, Arganda-Carreras I, Frise E, Kaynig V, Longair M, Pietzsch T, et al.  
896 Fiji: an open-source platform for biological-image analysis. *Nat Methods*.  
897 2012;9(7):676-82. <https://doi.org/10.1038/nmeth.2019> PMID: 22743772
- 898 76. Sander V, Sune G, Jopling C, Morera C, Izpisua Belmonte JC. Isolation and in vitro  
899 culture of primary cardiomyocytes from adult zebrafish hearts. *Nat Protoc*.  
900 2013;8(4):800-9. <https://doi.org/10.1038/nprot.2013.041> PMID: 23538883
- 901 77. Zhu C, Guo W. Detection and quantification of the giant protein titin by SDS-agarose  
902 gel electrophoresis. *MethodsX*. 2017;4:320-27.  
903 <https://doi.org/10.1016/j.mex.2017.09.007> PMID: 29872636
- 904 78. Soeno Y, Yajima H, Kawamura Y, Kimura S, Maruyama K, Obinata T. Organization  
905 of connectin/titin filaments in sarcomeres of differentiating chicken skeletal muscle  
906 cells. *Mol Cell Biochem*. 1999;190(1-2):125-31.  
907 <https://www.ncbi.nlm.nih.gov/pubmed/10098979> PMID: 10098979
- 908 79. Lien S, Koop BF, Sandve SR, Miller JR, Kent MP, Nome T, et al. The Atlantic  
909 salmon genome provides insights into rediploidization. *Nature*. 2016;533(7602):200-  
910 5. <https://doi.org/10.1038/nature17164> PMID: 27088604

- 911 80. Moriyama Y, Ito F, Takeda H, Yano T, Okabe M, Kuraku S, et al. Evolution of the  
912 fish heart by sub/neofunctionalization of an elastin gene. *Nat Commun*.  
913 2016;7:10397. <https://doi.org/10.1038/ncomms10397> PMID: 26783159
- 914 81. Wigle ED, Rakowski H, Kimball BP, Williams WG. Hypertrophic cardiomyopathy.  
915 Clinical spectrum and treatment. *Circulation*. 1995;92(7):1680-92.  
916 <https://doi.org/10.1161/01.cir.92.7.1680> PMID: 7671349
- 917 82. Maron BJ, Bonow RO, Cannon RO, 3rd, Leon MB, Epstein SE. Hypertrophic  
918 cardiomyopathy. Interrelations of clinical manifestations, pathophysiology, and  
919 therapy (2). *N Engl J Med*. 1987;316(14):844-52.  
920 <https://doi.org/10.1056/nejm198704023161405> PMID: 3547135
- 921 83. Tamura T, Onodera T, Said S, Gerdes AM. Correlation of myocyte lengthening to  
922 chamber dilation in the spontaneously hypertensive heart failure (SHHF) rat. *J Mol*  
923 *Cell Cardiol*. 1998;30(11):2175-81. <https://doi.org/10.1006/jmcc.1998.0775> PMID:  
924 9925355
- 925 84. Ikenishi A, Okayama H, Iwamoto N, Yoshitome S, Tane S, Nakamura K, et al. Cell  
926 cycle regulation in mouse heart during embryonic and postnatal stages. *Dev Growth*  
927 *Differ*. 2012;54(8):731-8. <https://doi.org/10.1111/j.1440-169X.2012.01373.x> PMID:  
928 22957921
- 929 85. Brodsky V, Sarkisov DS, Arefyeva AM, Panova NW, Gvasava IG. Polyploidy in  
930 cardiac myocytes of normal and hypertrophic human hearts; range of values.  
931 *Virchows Arch*. 1994;424(4):429-35. <https://doi.org/10.1007/BF00190566> PMID:  
932 8205355
- 933 86. Kruger M, Sachse C, Zimmermann WH, Eschenhagen T, Klede S, Linke WA.  
934 Thyroid hormone regulates developmental titin isoform transitions via the

- 935           phosphatidylinositol-3-kinase/ AKT pathway. *Circ Res.* 2008;102(4):439-47.
- 936           <https://doi.org/10.1161/CIRCRESAHA.107.162719> PMID: 18096819
- 937   87.   Keith DA, Paz A, Gallop PM, Glimcher MJ. Histologic and biochemical  
938   identification and characterization of an elastin in cartilage. *J Histochem Cytochem.*  
939   1977;25(10):1154-62. <https://doi.org/10.1177/25.10.72098> PMID: 72098
- 940   88.   Braun MH, Brill RW, Gosline JM, Jones DR. Form and function of the bulbus  
941   arteriosus in yellowfin tuna (*Thunnus albacares*), bigeye tuna (*Thunnus obesus*) and  
942   blue marlin (*Makaira nigricans*): static properties. *J Exp Biol.* 2003;206(Pt 19):3311-  
943   26. <https://doi.org/10.1242/jeb.00575> PMID: 12939364
- 944   89.   Braun MH, Brill RW, Gosline JM, Jones DR. Form and function of the bulbus  
945   arteriosus in yellowfin tuna (*Thunnus albacares*): dynamic properties. *J Exp Biol.*  
946   2003;206(Pt 19):3327-35. <https://doi.org/10.1242/jeb.00576> PMID: 12939365
- 947   90.   Icardo JM. Collagen and elastin histochemistry of the teleost bulbus arteriosus: false  
948   positives. *Acta Histochem.* 2013;115(2):185-9.  
949   <https://doi.org/10.1016/j.acthis.2012.03.002> PMID: 22494613
- 950   91.   Welty JC, Baptista L. *The life of birds.* 4 th ed. New York: Cengage Learning; 1988.
- 951   92.   Holt JP, Rhode EA, Kines H. Ventricular volumes and body weight in mammals. *Am*  
952   *J Physiol.* 1968;215(3):704-15. <https://doi.org/10.1152/ajplegacy.1968.215.3.704>  
953   PMID: 5671010
- 954   93.   Clark TD, Farrell AP. Effects of body mass on physiological and anatomical  
955   parameters of mature salmon: evidence against a universal heart rate scaling  
956   exponent. *J Exp Biol.* 2011;214(Pt 6):887-93. <https://doi.org/10.1242/jeb.051607>  
957   PMID: 21346114
- 958   94.   Cotter PA, Han AJ, Everson JJ, Rodnick KJ. Cardiac hemodynamics of the rainbow  
959   trout (*Oncorhynchus mykiss*) using simultaneous Doppler echocardiography and

- 960 electrocardiography. *J Exp Zool A Ecol Genet Physiol*. 2008;309(5):243-54.
- 961 <https://doi.org/10.1002/jez.453> PMID: 18366108
- 962 95. Muir CA, Neff BD, Damjanovski S. Adaptation of a mouse Doppler echocardiograph  
963 system for assessing cardiac function and thermal performance in a juvenile salmonid.  
964 *Conserv Physiol*. 2021;9(1):coab070. <http://doi.org/10.1093/conphys/coab070> PMID:  
965 34512992
- 966 96. Maksuti E, Carlsson M, Arheden H, Kovacs SJ, Broome M, Ugander M. Hydraulic  
967 forces contribute to left ventricular diastolic filling. *Sci Rep*. 2017;7:43505.  
968 <http://10.1038/srep43505> PMID: 28256604
- 969 97. Lunkenheimer PP. Systolic ventricular filling. *Eur J Cardiothorac Surg*.  
970 2004;26(3):662-3; author reply 63-4. <http://10.1016/j.ejcts.2004.05.024> PMID:  
971 15302074
- 972 98. Suga H, Hisano R, Goto Y, Yamada O. Normalization of end-systolic pressure-  
973 volume relation and Emax of different sized hearts. *Jpn Circ J*. 1984;48(2):136-43.  
974 <http://10.1253/jcj.48.136> PMID: 6700110
- 975 99. Dorn GW, 2nd. The fuzzy logic of physiological cardiac hypertrophy. *Hypertension*.  
976 2007;49(5):962-70. <http://10.1161/HYPERTENSIONAHA.106.079426> PMID:  
977 17389260
- 978 100. Bernardo BC, Weeks KL, Pretorius L, McMullen JR. Molecular distinction between  
979 physiological and pathological cardiac hypertrophy: experimental findings and  
980 therapeutic strategies. *Pharmacol Ther*. 2010;128(1):191-227.  
981 <http://10.1016/j.pharmthera.2010.04.005> PMID: 20438756
- 982 101. Weber KT, Brilla CG, Janicki JS. Myocardial fibrosis: functional significance and  
983 regulatory factors. *Cardiovasc Res*. 1993;27(3):341-8.  
984 <https://doi.org/10.1093/cvr/27.3.341> PMID: 8490934

- 985 102. Villari B, Campbell SE, Hess OM, Mall G, Vassalli G, Weber KT, et al. Influence of  
986 collagen network on left ventricular systolic and diastolic function in aortic valve  
987 disease. *J Am Coll Cardiol.* 1993;22(5):1477-84. [https://doi.org/10.1016/0735-](https://doi.org/10.1016/0735-1097(93)90560-n)  
988 [1097\(93\)90560-n](https://doi.org/10.1016/0735-1097(93)90560-n) PMID: 8227808
- 989 103. Patrick SM, Hoskins AC, Kentish JC, White E, Shiels HA, Cazorla O. Enhanced  
990 length-dependent Ca<sup>2+</sup> activation in fish cardiomyocytes permits a large operating  
991 range of sarcomere lengths. *J Mol Cell Cardiol.* 2010;48(5):917-24.  
992 <https://doi.org/10.1016/j.yjmcc.2010.02.008> PMID: 20170661
- 993 104. Hanashima A, Hashimoto K, Ujihara Y, Honda T, Yobimoto T, Kodama A, et al.  
994 Complete primary structure of the I-band region of connectin at which mechanical  
995 property is modulated in zebrafish heart and skeletal muscle. *Gene.* 2017;596:19-26.  
996 <https://doi.org/10.1016/j.gene.2016.10.010> PMID: 27725266
- 997 105. Greaser ML, Pleitner JM. Titin isoform size is not correlated with thin filament length  
998 in rat skeletal muscle. *Front Physiol.* 2014;5:35. <http://10.3389/fphys.2014.00035>  
999 PMID: 24550844
- 1000 106. Castillo A, Nowak R, Littlefield KP, Fowler VM, Littlefield RS. A nebulin ruler does  
1001 not dictate thin filament lengths. *Biophys J.* 2009;96(5):1856-65.  
1002 <http://10.1016/j.bpj.2008.10.053> PMID: 19254544
- 1003 107. Endler JA. Genetics of fishes: evolutionary genetics of fishes. *Science.*  
1004 1984;226(4670):41-2. <http://10.1126/science.226.4670.41> PMID: 17815416
- 1005 108. Macqueen DJ, Johnston IA. A well-constrained estimate for the timing of the  
1006 salmonid whole genome duplication reveals major decoupling from species  
1007 diversification. *Proc Biol Sci.* 2014;281(1778):20132881.  
1008 <https://doi.org/10.1098/rspb.2013.2881> PMID: 24452024

- 1009 109. Near TJ, Eytan RI, Dornburg A, Kuhn KL, Moore JA, Davis MP, et al. Resolution of  
1010 ray-finned fish phylogeny and timing of diversification. Proc Natl Acad Sci U S A.  
1011 2012;109(34):13698-703. <https://doi.org/10.1073/pnas.1206625109> PMID: 22869754
- 1012 110. Kraitavin W, Yoshitake K, Igarashi Y, Mitsuyama S, Kinoshita S, Kambayashi D, et  
1013 al. Transcriptome Analysis of Yamame (*Oncorhynchus masou*) in Normal Conditions  
1014 after Heat Stress. Biology (Basel). 2019;8(2) <https://doi.org/10.3390/biology8020021>  
1015 PMID: 30934851
- 1016 111. Wang LW, Huttner IG, Santiago CF, Kesteven SH, Yu ZY, Feneley MP, et al.  
1017 Standardized echocardiographic assessment of cardiac function in normal adult  
1018 zebrafish and heart disease models. Dis Model Mech. 2017;10(1):63-76.  
1019 <https://doi.org/10.1242/dmm.026989> PMID: 28067629
- 1020 112. Klaiman JM, Fenna AJ, Shiels HA, Macri J, Gillis TE. Cardiac remodeling in fish:  
1021 strategies to maintain heart function during temperature Change. PLoS One.  
1022 2011;6(9):e24464. <https://doi.org/10.1371/journal.pone.0024464> PMID: 21915331  
1023

## 1024 **Supporting information**

### 1025 **S1 Fig. Anatomical observations of a fish heart**

1026 (A) An image of the left lateral view of a masu salmon heart at 29 months post fertilization  
1027 (mpf). Scale bar = 1 cm. (B) Magnified view of the white box in panel (A). At, atrium (green  
1028 dashed line); V, ventricle (magenta dashed line); Ba, bulbus arteriosus (yellow dashed line);  
1029 Sv, sinus venosus (white dashed line); Di, diaphragms (blue dashed line); Li, liver. (C) Life  
1030 history of *Oncorhynchus masou masou*. (D) A juvenile *O. masou* at 6 mpf. Scale bar = 1 cm.  
1031 (E) Stereomicroscopic images of a juvenile heart. Scale bar = 1 mm.

1032 (TIFF)

1033

### 1034 **S2 Fig. Simultaneous echocardiographic and electrocardiographic measurements of** 1035 ***Oncorhynchus masou masou***

1036 (A) Method used for the fish echocardiography and electrocardiography. To record the cardiac  
1037 dynamics on the sagittal axis, anesthetized fish were turned upside down and secured to the  
1038 holder, and the transducer probe was vertically and directly positioned above the heart.  
1039 Electrodes were clipped to the pectoral fins and pelvic fin. Air was supplied continuously  
1040 during the experiments. (B, C) Echocardiographic images of the sagittal axis; (B) masu salmon  
1041 at 30 months post fertilization (mpf); (C) cherry salmon at 30 mpf. At, atrium (green dashed  
1042 line); V, ventricle (magenta dashed line); Ba, bulbus arteriosus (yellow dashed line); Li, liver.  
1043 (D) Electrocardiography results from the body surface of the masu salmon. P: P wave, QRS:  
1044 QRS complex, T: T wave.

1045 (TIFF)

1046

### 1047 **S1 Movie. Longitudinal axis echocardiography of a masu salmon**

1048 (mp4)

1049

1050 **S2 Movie. Longitudinal axis echocardiography of a cherry salmon**

1051 (mp4)

1052

1053 **S1 Table. Heart rates of the masu and cherry salmon**

1054 (docx)

1055

1056 **S3 Fig. Atrioventricular inflow waveforms at different R-R interval times**

1057 (A) Pulsed-wave Doppler images of masu (left column) and cherry salmon (right column).

1058 Upper row; representative ventricular ejection waveform ( $326.75 \pm 1.04$  ms in masu salmon

1059 #5 and  $351.75 \pm 1.09$  ms in cherry salmon #1). Second–lower rows; atrioventricular inflow

1060 waveforms observed at short, intermediate, and long R-R interval times. The yellow line

1061 indicated the average time from the peak of the R wave to the end of ventricular ejection. The

1062 yellow double-headed arrows indicated the time from the end of ventricular ejection to the

1063 onset of atrioventricular inflow. (B) Times of R-R interval and from the end of ventricular

1064 ejection until atrioventricular inflow were observed in each panel in (A).

1065 (TIFF)

1066

1067 **S4 Fig. *In vivo* atrial-ventricular pressure analysis of masu salmon**

1068 (A, B) Recordings of the ventricular pressure in the masu salmon at 34 mpf. Ventricular and

1069 atrial pressures during three heart cycles (A). Ventricular and atrial pressure in the ventricular

1070 diastole (B); magnification of the 1 and 2 s range of panel (A). The solid and dotted lines

1071 indicate the ventricular pressure and atrial pressure, respectively. VD, ventricular diastole; IR,

1072 isovolumic relaxation; AS, atrial systole.

1073 (TIFF)



1074

1075 **S5 Fig. End-diastolic pressure–volume relationship analysis for masu and cherry salmon**

1076 (A) The horizontal axis shows the ventricular chamber volume normalized by the mass of the  
1077 masu salmon ventricles (N = 4) and the cherry salmon ventricles (N = 3). (B) Ventricular mass  
1078 and index of ventricular stiffness in the masu and cherry salmon. The results of the EDPVR  
1079 (A) were applied to Equation (1) to obtain the exponential  $C$ , ○: masu salmon, ●: cherry  
1080 salmon.

1081 (TIFF)

1082

1083 **S6 Fig. Hematoxylin and eosin staining of isolated fish hearts**

1084 (A–H) Hematoxylin and eosin staining images of the sagittal sections of the hearts at 29 months  
1085 post fertilization: masu salmon (A–D) and cherry salmon (E–H). (A, E) Images of the whole  
1086 heart. Scale bars = 5 mm. (B, F) Magnified images of the ventricles. Scale bars = 1 mm. (C,  
1087 G) High-magnification images of the compact layers. Scale bars = 100  $\mu$ m. (D, H) High-  
1088 magnification images of the spongy layers. Scale bars = 100  $\mu$ m. The cytoplasm is shown in  
1089 magenta, and the nuclei are shown in blue–purple. At, atrium; V, ventricle; Ba, bulbus  
1090 arteriosus; Cl, compact layer; Sl, spongy layer.

1091 (TIFF)

1092

1093 **S7 Fig. Immunofluorescence staining of cardiomyocytes**

1094 (A–F) Immunofluorescence images show attached cardiomyocytes from the masu and cherry  
1095 salmon at 29 months post fertilization. Cardiomyocytes were stained with antibodies  
1096 recognizing Alpha-actinin-2 at z-lines (green) and Hoechst 33342 to detect nuclei (blue). (B,  
1097 D) Magnifications of the images in (A) and (C). (E, F) Merged bright-field and immunostaining

1098 images. (F) Non- cardiomyocyte; magnification view of the white dotted line enclosure in (E).

1099 Scale bars = 20  $\mu\text{m}$  in (A), (C) and (E), and 5  $\mu\text{m}$  in (B), (D) and (F).

1100 (TIFF)

1101

### 1102 **S8 Fig. A binucleated cardiomyocyte**

1103 (A) A Hoechst 33342-stained binucleated cardiomyocyte (blue) in a cherry salmon. (B)

1104 Magnified image shows Hoechst 33342 signals in the grayscale mode. Scale bars = 20  $\mu\text{m}$ .

1105 (TIFF)

1106

### 1107 **S9 Fig. Anti-Connectin antibody immunoblots**

1108 Representative and original immunoblot image showing the detection of Connectin expression

1109 in masu (Ma) and cherry (Ch) salmon hearts. Connectin N2A isoform in the mouse skeletal

1110 muscle in lanes 1 and 9 (M1, 3,700 kDa) and the N2B isoform in the left ventricle of mice in

1111 lanes 2 and 10 (M2, 3,000 kDa) were used as a positive control for the experiment and as a

1112 guide for molecular weight.  $\alpha$ -Connectin (T1) and  $\beta$ -connectin (T2) indicate intact Connectins

1113 and their degraded products, respectively.

1114 (TIFF)

1115

### 1116 **S10 Fig. Electron micrographs of masu and cherry salmon hearts**

1117 (A–D) Representative transmission electron microscopy images of the cross-sections and

1118 longitudinal sections of the atrial sarcomeres of masu and cherry salmon at 29 months post

1119 fertilization (mpf). Insets of (A, C) showed higher magnifications of cross-sections of the

1120 myofibril bundles. (E) The graph showed atrium sarcomere lengths of the z-line to z-line in

1121 masu salmon ( $2.13 \pm 0.16 \mu\text{m}$ , N = 25) and cherry salmon ( $2.12 \pm 0.11 \mu\text{m}$ , N = 103). One or

1122 two ultrathin slices were observed in each tissue sample. Lines and error bars indicate means

1123 ± standard deviations. ○: masu salmon, ●: cherry salmon. (F–H) Representative transmission  
1124 electron microscopy images of the bulbus arteriosus of masu and cherry salmon at 29 mpf. (G)  
1125 Higher magnification image in the black dashed line in (F). FM: microfilament; CF: collagen  
1126 fiber Scale bars = 500 nm in (A, C), 1 μm in (B, D), and 2 μm in (F–H).  
1127 (TIFF)  
1128

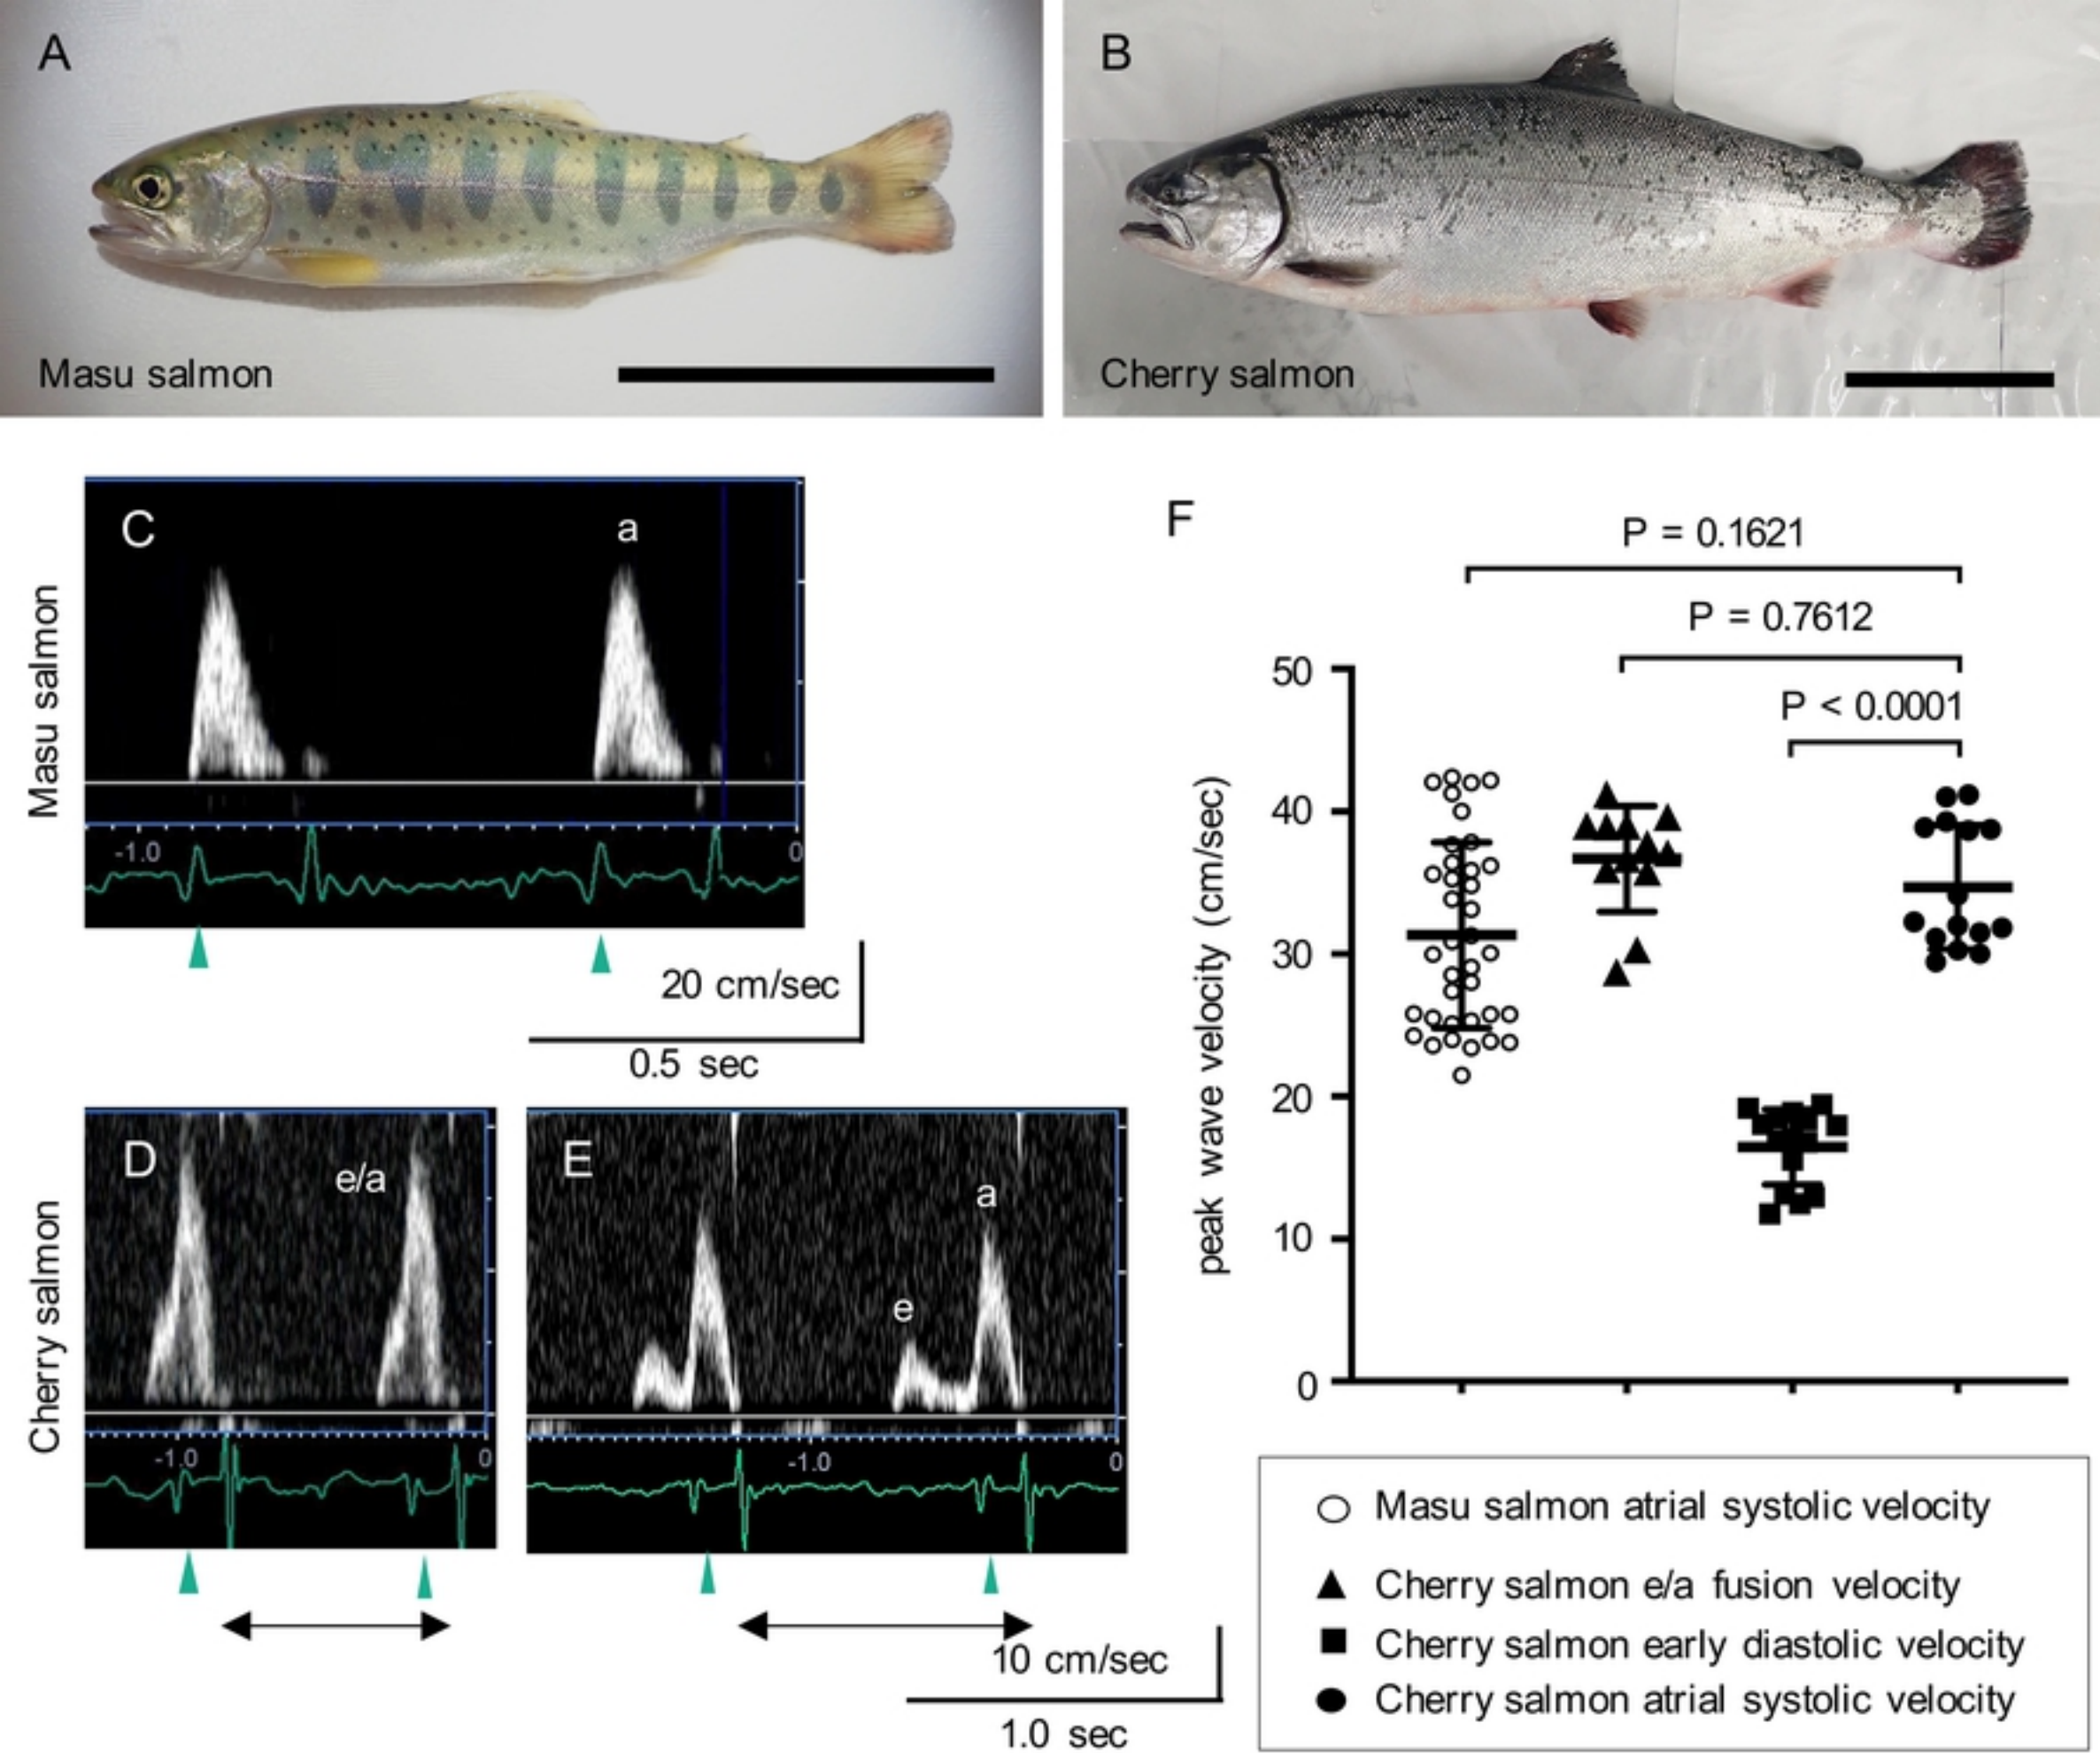

Figure 1

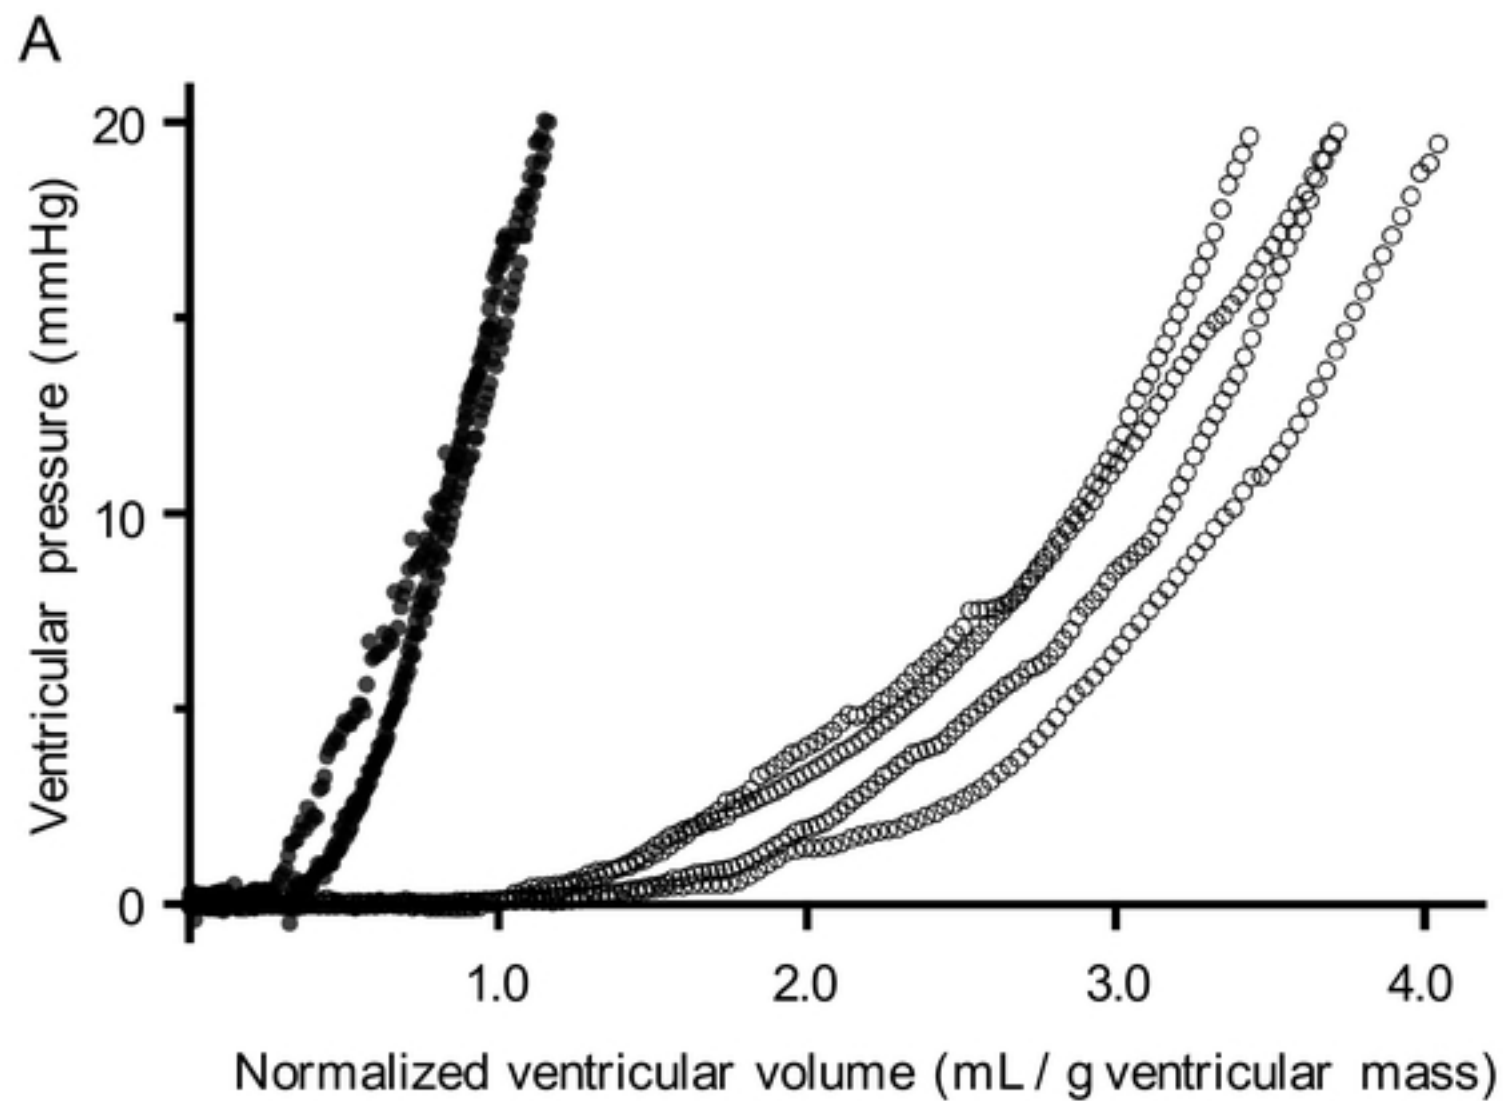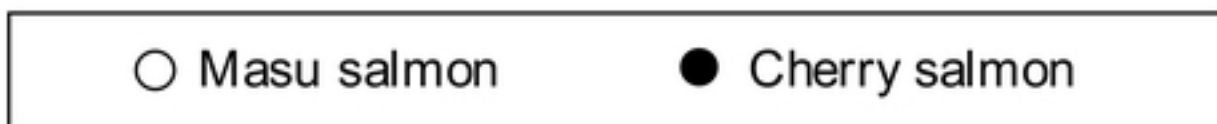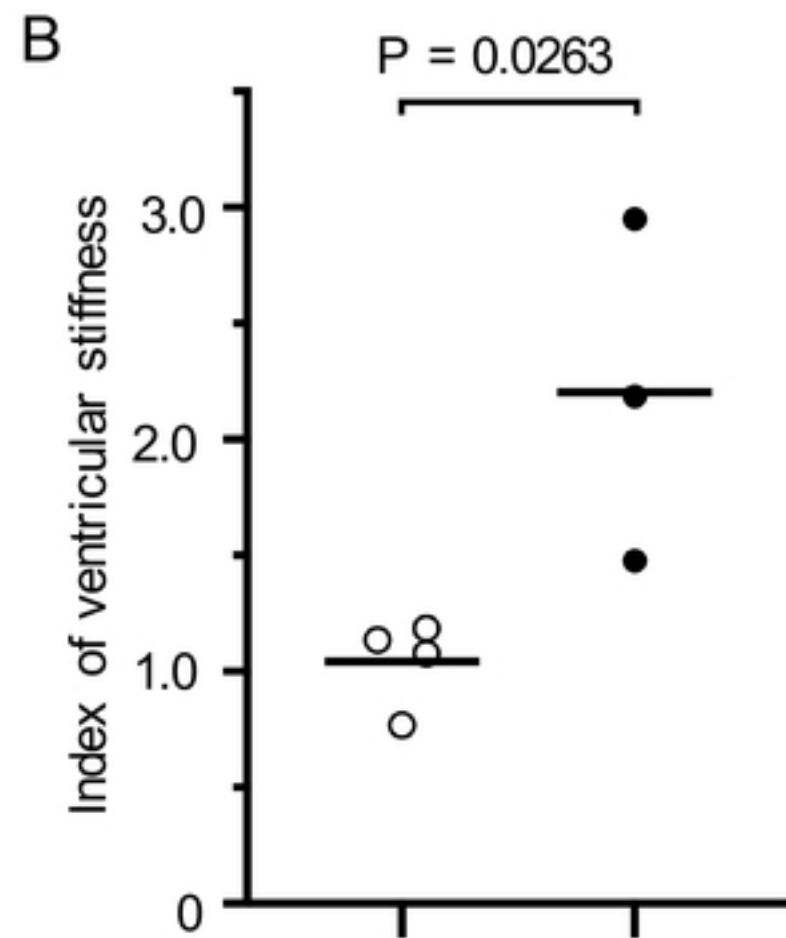

Figure 2

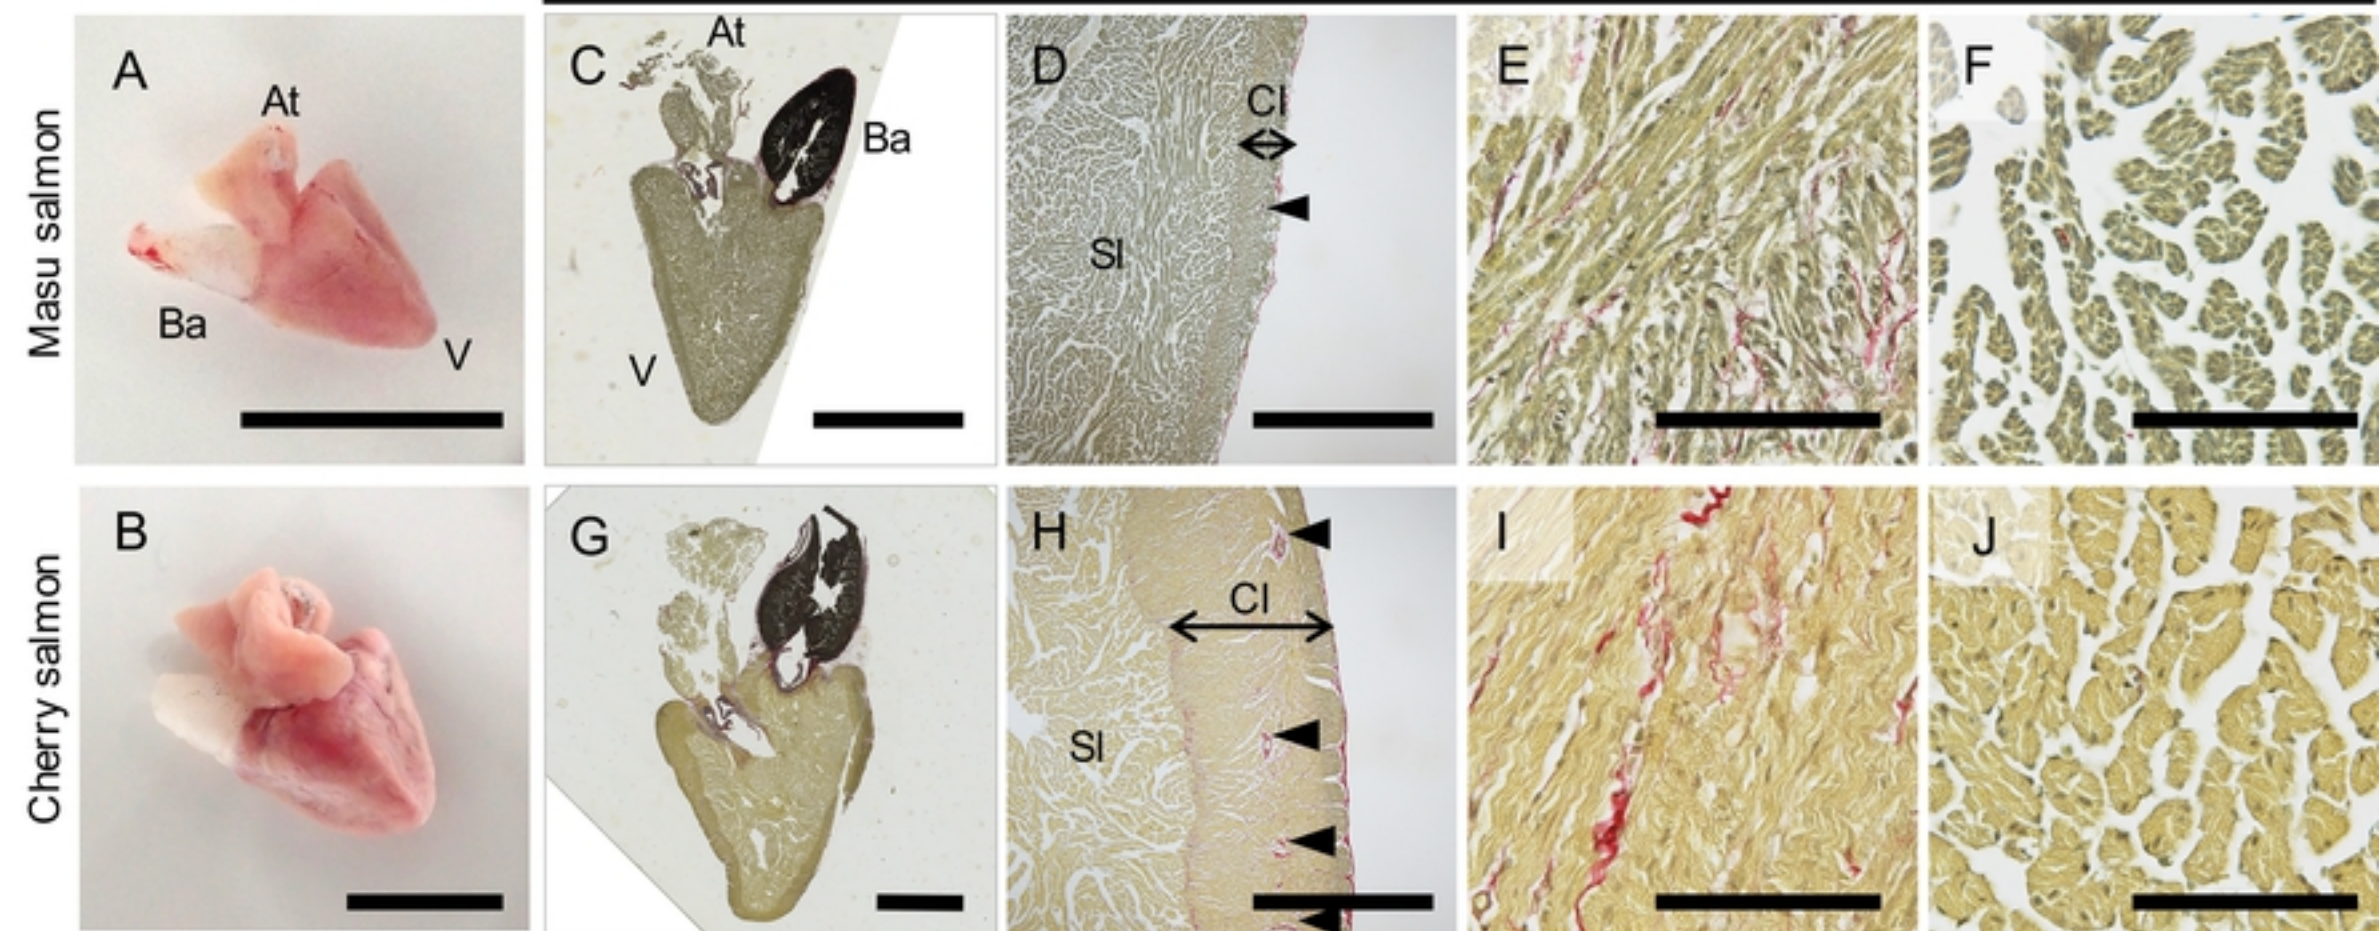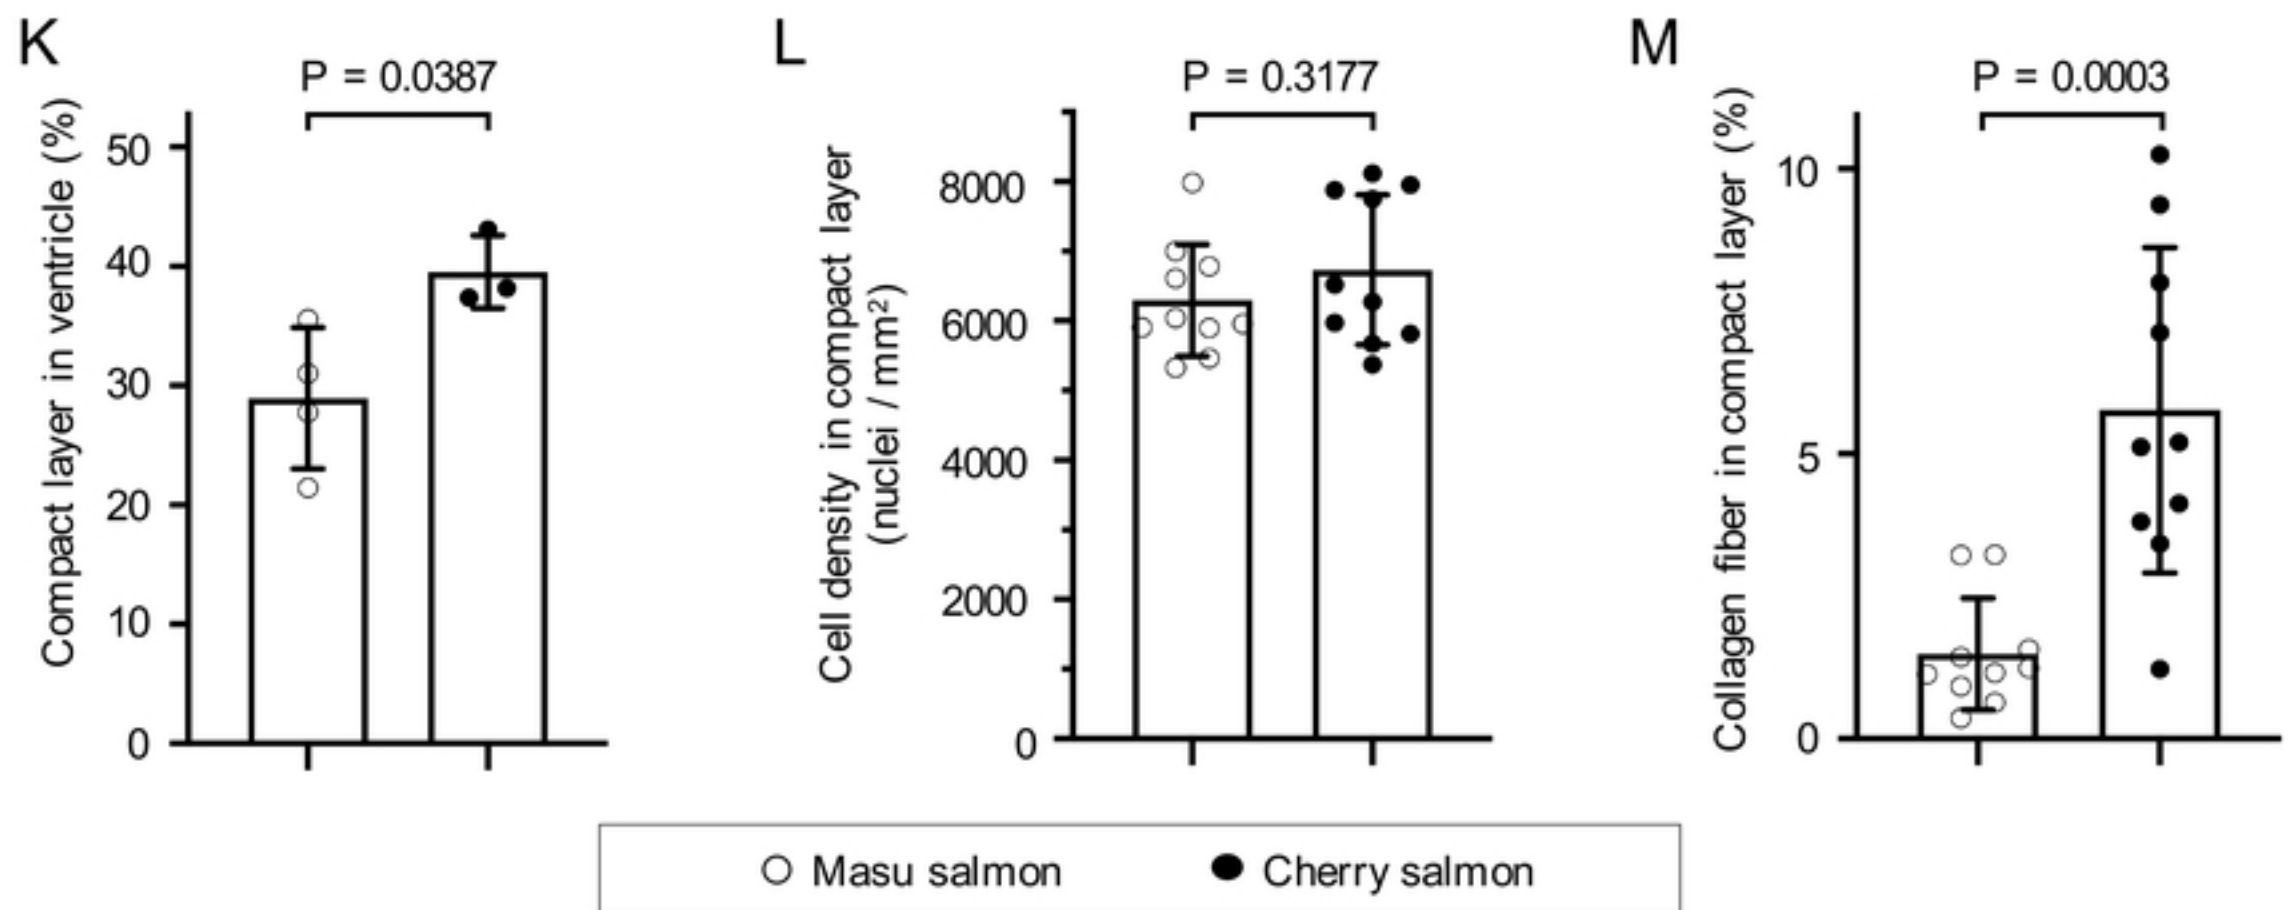

Figure 3

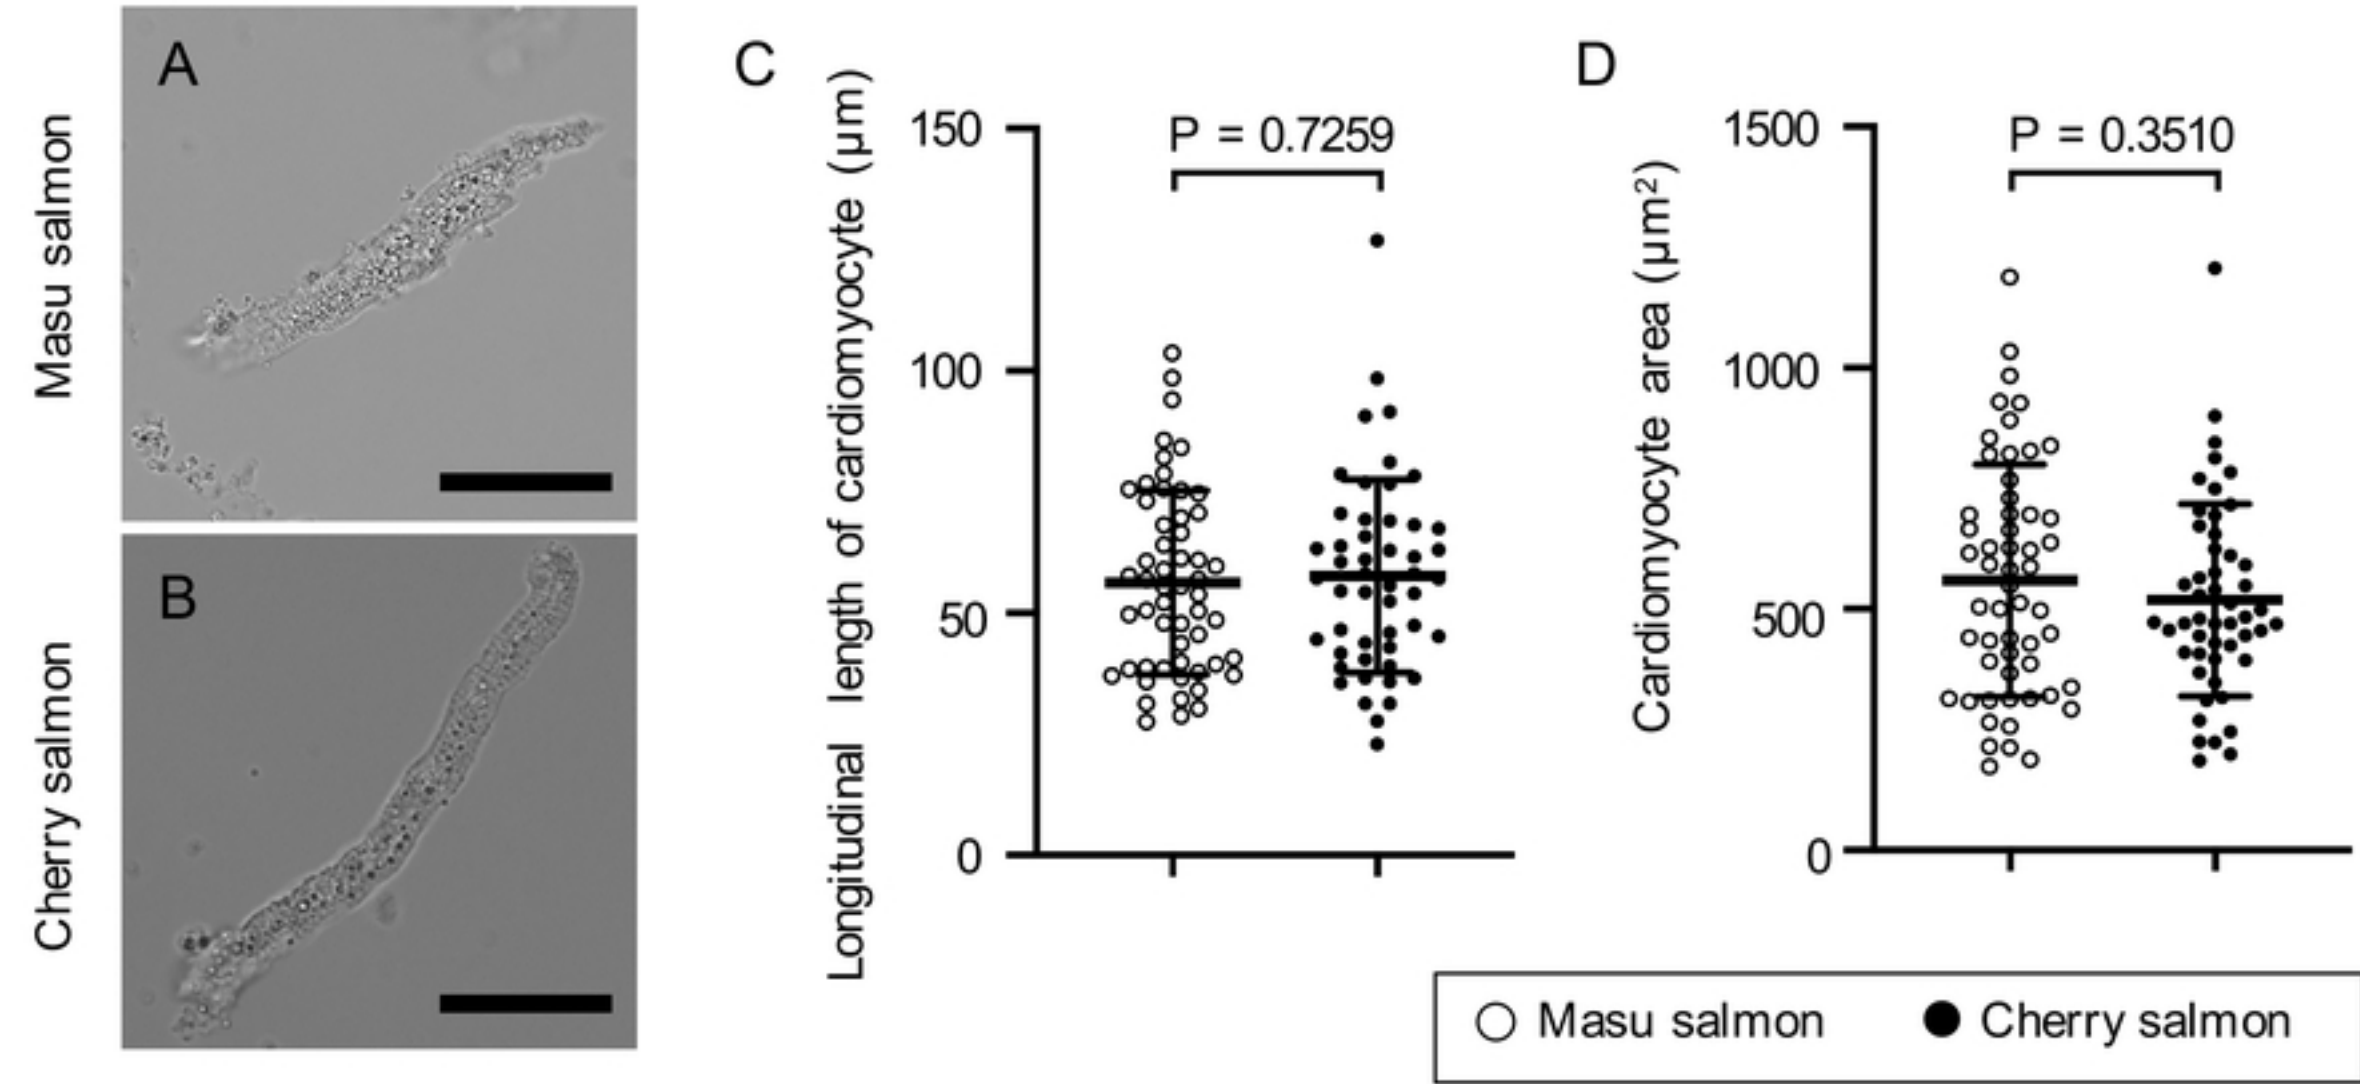

Figure 4

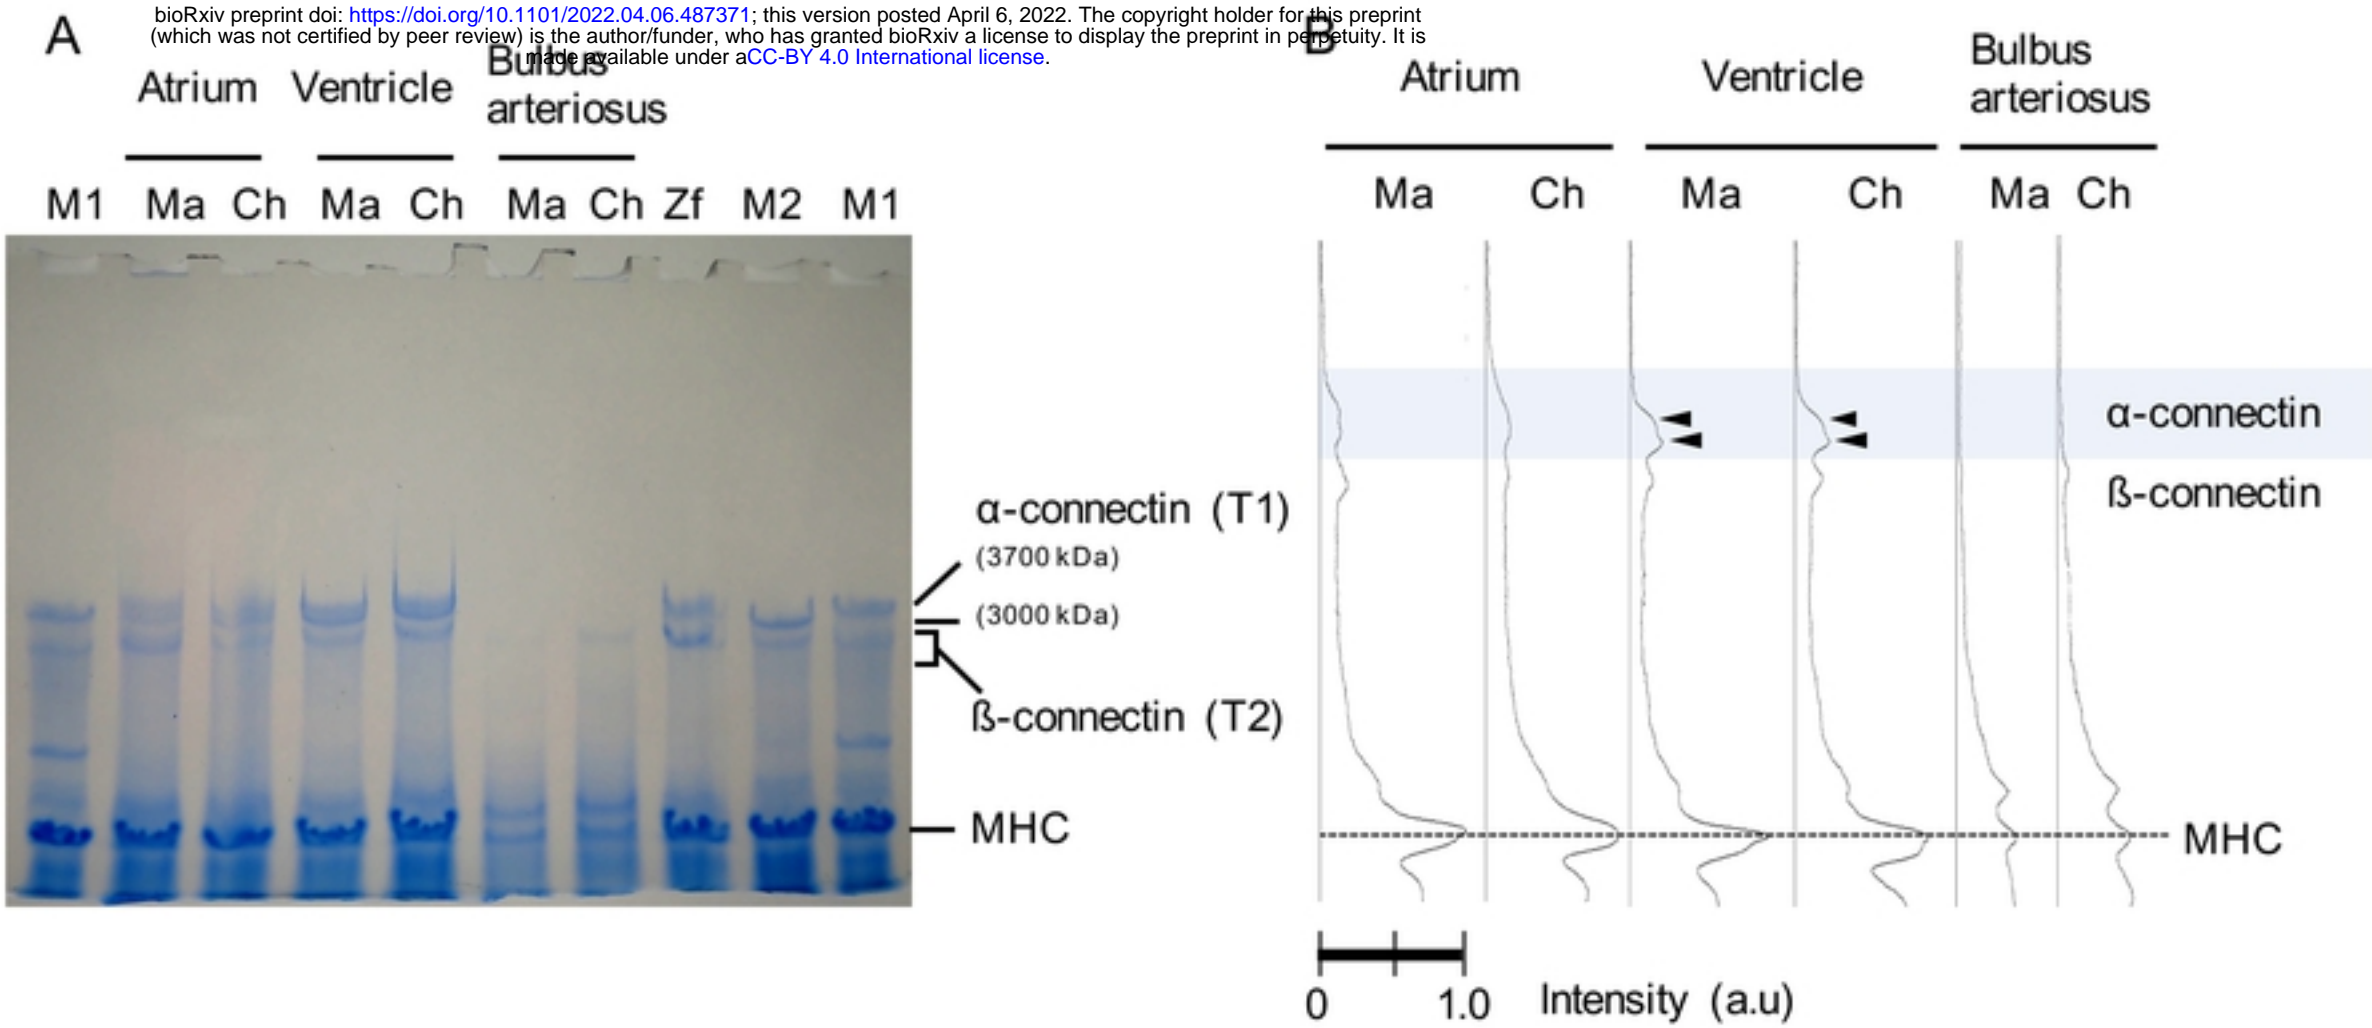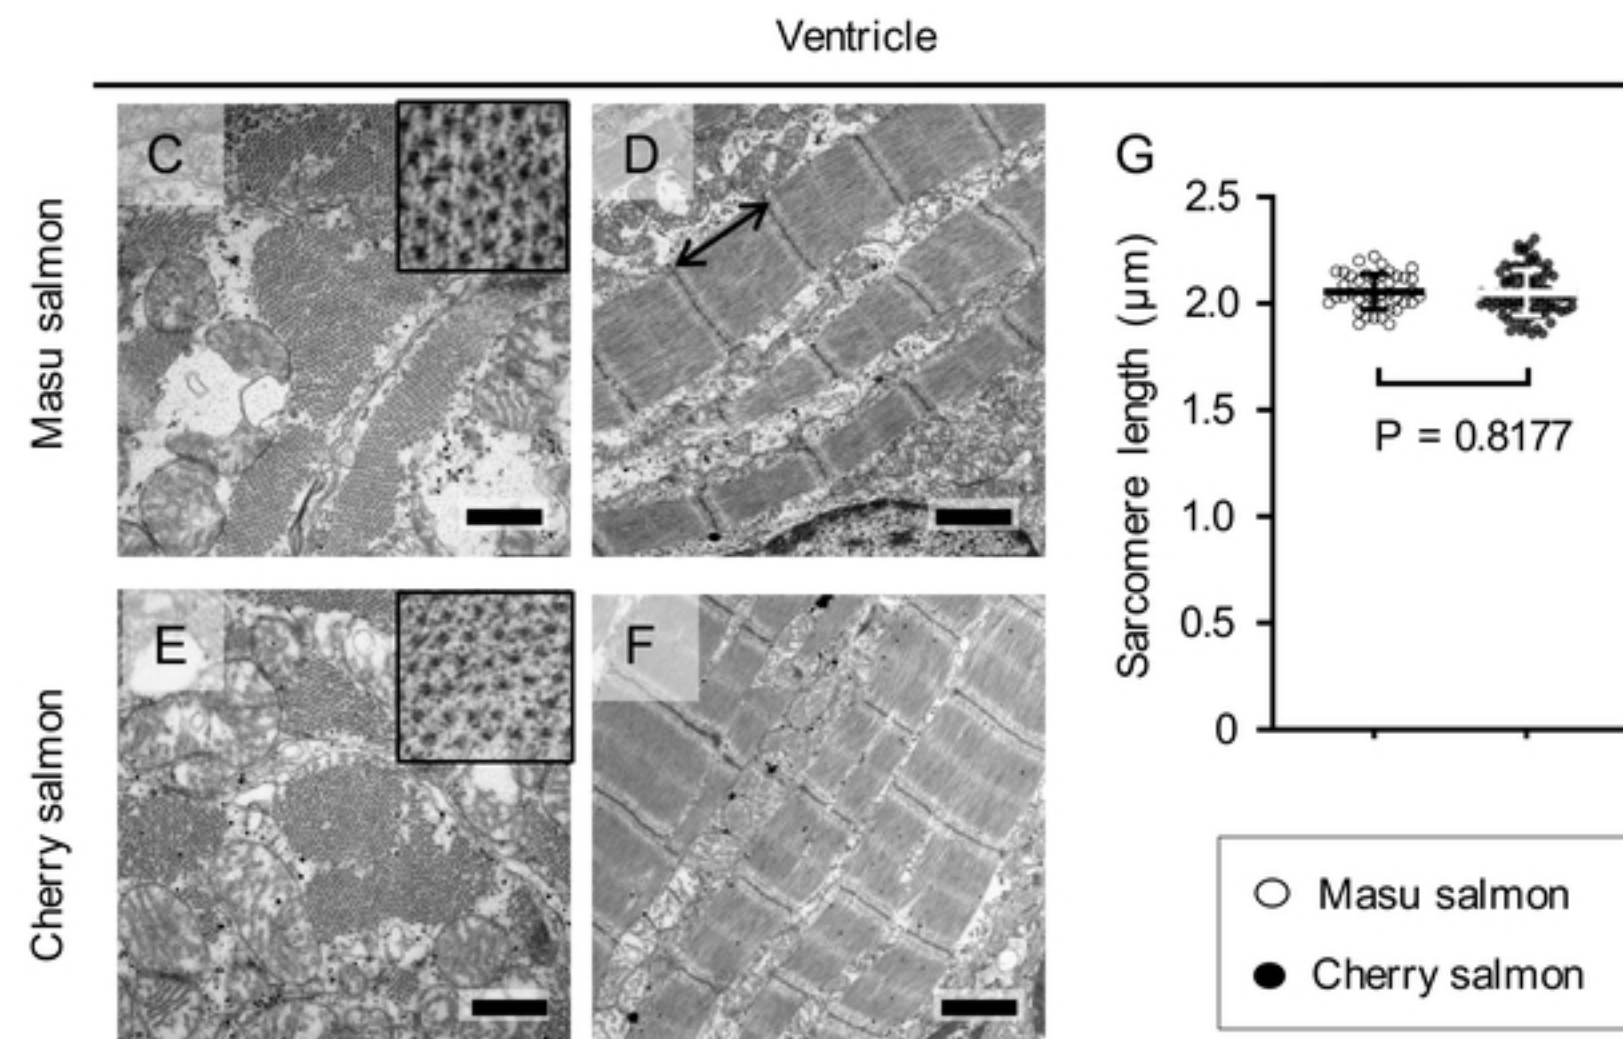

Figure 5
